1 **Title:**

2 **Cytokinin functions as an asymmetric and anti-gravitropic signal in lateral roots**

3

4

5 **Authors:**

6 Sascha Waidmann<sup>1</sup>, Michel Ruiz Rosquete<sup>1</sup>, Maria Schöller<sup>1</sup>, Heike Lindner<sup>2</sup>, Therese  
7 LaRue<sup>2</sup>, Elizabeth Sarkel<sup>1</sup>, Ivan Petřík<sup>3</sup>, Kai Dünser<sup>1</sup>, Shanice Martopawiro<sup>5</sup>, Rashmi  
8 Sasidharan<sup>5</sup>, Ondrej Novak<sup>3</sup>, Krzysztof Wabnik<sup>4</sup>, José R. Dinneny<sup>2</sup>, Jürgen Kleine-  
9 Vehn<sup>1</sup>

10

11 **Affiliations:**

12 <sup>1</sup>Department of Applied Genetics and Cell Biology, University of Natural Resources  
13 and Life Sciences (BOKU), Muthgasse 18, 1190 Vienna, Austria

14 <sup>2</sup>Department of Biology, Stanford University, 260 Panama Street, Stanford, CA 94305  
15 United States

16 <sup>3</sup>Laboratory of Growth Regulators, Centre of the Region Haná for Biotechnological and  
17 Agricultural Research, Faculty of Science of Palacký University and Institute of  
18 Experimental Botany of the Czech Academy of Sciences, Šlechtitelů 27, 78371  
19 Olomouc, Czech Republic

20 <sup>4</sup>Centro de Biotecnología y Genómica de Plantas (Universidad Politécnica de Madrid  
21 - Instituto Nacional de Investigación y Tecnología Agraria y Alimentaria), Autopista M-  
22 40, Km 38 - 28223 Pozuelo de Alarcón, Spain

23 <sup>5</sup>Plant Ecophysiology, Institute of Environmental Biology, Utrecht University,  
24 Padualaan 8, 3584 CH Utrecht, The Netherlands

25

26 \*Correspondence should be addressed to J.K.-V. ([juergen.kleine-vehn@boku.ac.at](mailto:juergen.kleine-vehn@boku.ac.at))

27

28 Key words: root system architecture, auxin, cytokinin, lateral root, radial expansion,  
29 hormonal crosstalk, GWAS, GSA

30

## 31 **Abstract**

32 **Directional organ growth allows the plant root system to strategically cover its**  
33 **surroundings. Intercellular auxin transport is aligned with the gravity vector in**  
34 **the primary root tips, facilitating downward organ bending at the lower root**  
35 **flank. Here we show that cytokinin signaling functions as a lateral root specific**  
36 **anti-gravitropic component, promoting the radial distribution of the root system.**  
37 **We performed a genome-wide association study and revealed that signal peptide**  
38 **processing of Cytokinin Oxidase 2 (CKX2) affects its enzymatic activity and,**  
39 **thereby, determines the degradation of cytokinins in natural *Arabidopsis***  
40 ***thaliana* accessions. Cytokinin signaling interferes with growth at the upper**  
41 **lateral root flank and thereby prevents downward bending. Our interdisciplinary**  
42 **approach revealed that two phytohormonal cues at opposite organ flanks**  
43 **counterbalance each other's negative impact on growth, suppressing organ**  
44 **growth towards gravity and allow for radial expansion of the root system.**

45

## 46 **Introduction**

47 Root architectural traits define plant performance and yield (Uga et al., 2013). The  
48 radial spreading of the root system depends on the directional growth of primary and  
49 secondary roots. The phytohormone auxin plays a central role in aligning root organ  
50 growth towards gravity (Su et al., 2017). In the root tip, columella cells perceive  
51 changes in gravity via statolith sedimentation (Leitz et al., 2009). The relative change  
52 in statolith positioning triggers a partial polarization of redundant PIN3, PIN4 and PIN7  
53 auxin efflux carriers towards this side, leading to enhanced auxin transport along the  
54 gravity vector (Friml et al., 2002; Kleine-Vehn et al., 2010). The asymmetric distribution  
55 of auxin eventually reduces cellular elongation rates at the lower root flank, which  
56 consequently leads to differential growth within the organ and bending towards gravity  
57 (Friml et al., 2003; Rosquete et al., 2013; Ruiz Rosquete et al., 2018).

58 Lateral roots (LRs) substantially differ from main roots, establishing a distinct  
59 gravitropic set point angle (GSA) (Digby and Firn, 1995). The divergent developmental  
60 programs of lateral and main (primary) roots allow the root system to strategically cover  
61 the surrounding substrate. In *Arabidopsis*, LRs emerge from the main root at a 90°  
62 angle (stage I LRs) and afterwards display maturation of gravity sensing cells, as well  
63 as the *de-novo* formation of an elongation zone (Rosquete et al., 2013). Transient

64 expression of PIN3 in columella cells temporally defines asymmetric auxin distribution  
65 and differential elongation rates in stage II LR<sub>s</sub> (Guyomarc'h et al., 2012; Rosquete et  
66 al., 2013). This developmental stage lasts 8-9 hours and is characterized by  
67 asymmetric growth towards gravity at a slower rate than in primary roots (Rosquete et  
68 al., 2013; Schöller et al., 2018). During this phase of development, the primary GSA of  
69 LR<sub>s</sub> is established. The subsequent repression of PIN3 in columella cells of stage III  
70 LR<sub>s</sub> coincides with symmetric elongation, maintaining this primary GSA (Rosquete et  
71 al., 2013). Notably, the de-repression of PIN3 and PIN4 in columella cells of older stage  
72 III LR<sub>s</sub> does not correlate with additional bending to gravity (Ruiz Rosquete et al.,  
73 2018). This finding illustrates that the primary GSA is developmentally maintained,  
74 determining an important root architectural trait. Moreover, a stage III LR will return to  
75 its initial GSA if it is reoriented relative to the gravity vector (Mullen and Hangarter,  
76 2003; Rosquete et al., 2013; Roychoudhry et al., 2013). Accordingly, the partial  
77 suppression of a full gravitropic response in recently emerged LR<sub>s</sub> is critical for  
78 establishing the primary growth direction of LR<sub>s</sub>, which importantly contributes to the  
79 root system architecture.

80 Despite the apparent importance of directional LR growth for radial exploration  
81 of the root system, the underlying suppressive mechanisms are largely unexplored.  
82 Using genetic, physiological, computational, biochemical, and cell biological  
83 approaches, we reveal that two opposing hormonal cues at the lower and upper lateral  
84 root flank counterbalance each other and set directional LR growth.

85

## 86 **Angular lateral root growth displays substantial natural variation in *Arabidopsis*** 87 ***thaliana***

88 To examine the natural diversity in radial root growth, we screened 210 sequenced  
89 *Arabidopsis* accessions (Figure 1A, Table S1) and quantified their primary GSA of LR<sub>s</sub>.  
90 When grown *in vitro* on the surface of the growth medium, we observed extensive  
91 natural variation for the mean GSA values, detecting a deviation of about 40° between  
92 most extreme accessions (Figure 1B).

93 Because the *in vitro* approach allowed only two-dimensional analysis of root  
94 growth, we further assessed angular growth of LR<sub>s</sub> in three dimensional and soil  
95 systems. For this purpose, we studied a subset (depicted by red and blue lines in  
96 Figure 1B) of hyper- and hypo-responsive accessions in greater detail (Figure 1C). To  
97 allow three-dimensional root expansion *in vitro*, we grew this subset of accessions in

98 growth medium-filled cylinders (Ruiz Rosquete et al., 2018) (Figure S1A). In addition,  
99 we used the GLO-Roots system (Rellán-Álvarez et al., 2015), which is a luciferase  
100 (LUC)-based imaging platform to visualize root systems in a soil environment (Figure  
101 S1B). Accordingly, we transformed the same subset of accessions with *pUBQ:LUC2o*,  
102 ubiquitously driving LUC expression. In the Col-0 reference accession, about 60% of  
103 emerged LRs displayed a GSA between 51° and 70° in all three growth conditions  
104 (Figure 1C-E). In all growth systems, hypo- and hyper-responsive accessions  
105 displayed a pronounced shift towards higher (71°-90° and 91°-110°) and lower (31°-  
106 50°) angle categories, respectively (Figure 1C-E). This suggests that our two-  
107 dimensional, *in vitro* screen is highly suitable to identify natural accessions with  
108 diverging GSA values of their root systems.

109

### 110 **Genome wide association study reveals a link between cytokinin metabolism** 111 **and angular growth of lateral roots**

112 Next, we sought to identify molecular players involved in the LR trait of our interest. To  
113 achieve this, we used our quantitative data on primary GSA of LRs and conducted a  
114 genome-wide association study (GWAS) (Seren et al., 2012). We identified several  
115 chromosomal regions, displaying associations with our trait (Figure 2A). A prominent  
116 peak at chromosome 2 drew our attention to a thymine (T)/guanine (G) single-  
117 nucleotide polymorphism (SNP) located in the *CYTOKININ OXIDASE2 (CKX2)* gene  
118 (position 8,447,233) (Figure 2B). Importantly, the minor G allele, showing a frequency  
119 of 19.5% in all sequenced and 32.7% in our set of accessions, was associated with  
120 increased GSA values, reflecting more perpendicular LR growth to gravity (Figure 2C).  
121 Notably, linkage disequilibrium analysis showed that adjacent SNPs display  
122 pronounced non-random association with our SNP of interest (Figure S2), suggesting  
123 that the *CKX2* gene could be linked to variations in angular growth of LRs.

124 CKX enzymes are responsible for the irreversible degradation of cytokinins  
125 (CKs) via the oxidative cleavage of their side chain (Schmülling et al., 2003). Indeed,  
126 CK metabolism was affected in *ckx2-1* (*ckx2* in *Col-0* background) mutant roots (Figure  
127 S3A-E), suggesting that CKX2-dependent metabolism of CKs may contribute to GSA  
128 establishment in lateral roots. To test whether this class of phytohormones may  
129 regulate angular growth of LRs, we initially transferred 7-day old seedlings of the  
130 reference accession *Col-0* to medium supplemented with CKs. We observed a  
131 concentration-dependent increase in GSA values of LRs emerging in presence of

132 active CKs, such as 6-Benzylaminopurin (BAP) (Figure 2D), trans-zeatin (tZ) and  
133 isopentenyladenine (iP) (Figure S3F and G). Conversely, CK receptor mutants showed  
134 accelerated bending of LRs and accordingly decreased GSA values (Figure 2E).  
135 These data suggest that cytokinin signaling interferes with downward bending of  
136 emerged LRs. Notably, emerging LRs of winter oilseed rape also displayed reduced  
137 bending of LRs when treated with BAP (Figure S3H), suggesting that the effect of CK  
138 on directional LR growth is likely to be conserved.

139 To further assess the importance of CKX2 in GSA establishment, we disrupted  
140 CKX activity in the reference accession *Col-0*. Treatments with the CKX inhibitor  
141 INCYDE (Zatloukal et al., 2008) phenocopied the *ckx2* loss-of-function mutant, both  
142 displaying more horizontal LRs when compared to its respective controls (Figure 2F,  
143 G). On the other hand, *CKX2* overexpressing (OX) plants showed accelerated bending  
144 of LRs, phenocopying the CK receptor mutants (Figure 2G). These data suggest that  
145 CK signaling defines directional lateral root growth by reducing LR bending after  
146 emergence.

147

### 148 **Cytokinin Response Factors define angular growth of lateral roots**

149 Our data indicates that CK signaling impacts the angular growth of emerged LRs.  
150 Therefore, we assessed whether CK-dependent transcription factors indeed have an  
151 impact on LR growth in the reference accession *Col-0*. It has been previously shown  
152 that CK signaling initiates transcriptional changes via the *Arabidopsis* response factors  
153 (ARRs) (Skylar et al., 2010) and the cytokinin response factors (CRFs) (Raines et al.,  
154 2015; Šimášková et al., 2015). According to available organ specific microarray data  
155 (Brady et al., 2007), *ARR3* and *ARR4* as well as *CRF2* and *CRF3* (Figure S4A-B) were  
156 strongly upregulated in older LRs. However, we did not detect any expression of *ARR3*  
157 and *ARR4* in young stage II LRs, using promoter GUS reporter lines for *ARR3* and  
158 *ARR4* (*pARR3:GUS/ pARR4:GUS*; Figure S4C)). Moreover, angular growth of LRs  
159 was not altered in *arr3* or *arr4* mutants (Figure S4D). On the other hand, we confirmed  
160 expression of *CRF2* and *CRF3* in the early stages of LR development (Figure 3A and  
161 S4E). *pCRF2:GFP-GUS* was ubiquitously expressed in young LRs, while *pCRF3:GFP-*  
162 *GUS* was preferentially expressed in cortical and epidermal cell files (Figure 3A and  
163 S4E). Notably, compared to emerged laterals, the main root displayed much weaker  
164 *CRF2* and *CRF3* expression (Figure S4F), suggesting that *CRF2* and *CRF3* are  
165 particularly highly expressed in young LRs.

166 In agreement with *CRF2* and *CRF3* expression in emerged LRs, loss-of-function  
167 alleles of *crf2* and *crf3* displayed enhanced bending of LRs (Figure 3B and S4G).  
168 Conversely, we found that ubiquitous overexpression of either *CRF2* or *CRF3* led to  
169 more horizontal LRs (Figure 3B).

170 This set of data confirms that cytokinin signaling, utilizing transcription factors  
171 such as *CRF2* and *CRF3*, regulates angular growth of LRs.

172

### 173 **Cytokinin signaling integrates environmental cues into angular growth of lateral** 174 **roots**

175 Our data supports a role for cytokinin signaling in modulating angular growth of LRs.  
176 To investigate whether cytokinin modulates angular LR growth in response to  
177 environmental cues, we examined whether the primary GSA of *Arabidopsis* accessions  
178 is linked to geographic origins. Intriguingly, accessions with the largest GSA values  
179 predominantly originated in Nordic (above 58°N) regions (Figure 4A). In addition, the  
180 above described minor G allele of *CKX2*, phenocopying the *ckx2* loss of function (in  
181 *Col-0*), was notably the most prevalent allele in the north of Sweden (Figure 4B).  
182 Previous work showed that *Arabidopsis* accessions in the north of Sweden are fully  
183 vernalized before snow fall (Duncan et al., 2015). In fact, the respective habitat in the  
184 north of Sweden is most of the year covered with snow (Figure S5A). Snowpack  
185 insulation capacity can protect plants from extreme temperatures, but may also restrict  
186 soil-atmosphere gas exchange, eventually leading to hypoxia in the soil (Martz et al.,  
187 2016). Additionally, rapid snowmelt in spring can lead to temporary soil flooding, which  
188 depletes soil oxygen and may restrict the amount of oxygen reaching the root tissues.  
189 Hypoxic conditions have been shown to induce bending in the primary root as a  
190 possible adaptive avoidance response (Eysholdt-Derzso and Sauter, 2017). Therefore,  
191 we asked whether hypoxia conditions also modulate the bending of LRs. In contrast to  
192 the primary root response, we observed that hypoxic stress reduced bending in  
193 emerged LRs (Figure 4C), demonstrating distinct pathways to regulate root bending in  
194 primary and secondary roots. Interestingly, hypoxia stress for 4 hours was sufficient to  
195 increase GSA of subsequently emerged LRs in *Col-0* (Figure 4C), mimicking the *ckx2*  
196 loss of function phenotype. Furthermore, hypoxic stress did not further increase GSA  
197 in the *ckx2* mutant (Figure 4C), proposing that CK metabolism could mediate hypoxia-  
198 dependent repression of LR bending. Furthermore, the LRs of *ahk2 ahk4* cytokinin  
199 receptor mutants were insensitive to the hypoxia-induced repression of LR bending

200 (Figure 4D). Accordingly, we conclude that cytokinin signaling integrates  
201 environmental signals, such as hypoxia, into GSA establishment of emerged LR.

202

### 203 **Single base-pair variation in *CKX2* impacts on its *in-planta* activity**

204 Our data proposes that variation in *CKX2* is linked to the control of radial root system  
205 expansion in natural *Arabidopsis* accessions. The previously mentioned G allele of  
206 *CKX2* is associated with higher GSA values (Figure 2C), which phenocopies the loss  
207 of *CKX2* function or increase in CK levels (Figure 2D). Accordingly, we next assessed  
208 whether the identified SNP affects the activity of *CKX2*. The underlying T to G mutation  
209 alters the first amino acid in the mature enzyme from an isoleucine (I) to a methionine  
210 (M). This mutation is situated just after the predicted cleavage site of a signal peptide  
211 (SP). The SP allows *CKX2* to be inserted into the endoplasmic reticulum and to be  
212 subsequently secreted into the extracellular space (apoplast) (Schmülling et al., 2003).  
213 To assess potential trafficking or processing defects caused by the amino acid change  
214 (Samalova et al., 2006), we generated a ratiometric *CKX2* reporter by fusing the Green  
215 Fluorescent Protein (GFP) and mScarlet to the N-terminal and C-terminal ends of  
216 *CKX2*, respectively. Fluorescent mScarlet signal of the non-mutated *CKX2*<sup>I</sup> readily  
217 accumulated in the apoplast, suggesting that the fluorescent tags do not abolish  
218 processing and/or secretion of *CKX2*-mScarlet (Figure 5A and S5B). Ratiometric  
219 imaging of GFP and mScarlet revealed a higher degree of co-localization for mutated  
220 version *CKX2*<sup>M</sup>, suggesting reduced processing and/or secretion of *CKX2*<sup>M</sup> when  
221 compared to *CKX2*<sup>I</sup> (Figure 5B). To visualize the effect of the T to G mutation on SP  
222 cleavage, we N-terminally tagged *CKX2* with GFP and subsequently expressed  
223 GFP<sup>SP</sup>*CKX2*<sup>I</sup> and its respective mutated version GFP<sup>SP</sup>*CKX2*<sup>M</sup> in tobacco. Western  
224 blot analysis revealed a decreased cleavage of GFP<sup>SP</sup>*CKX2*<sup>M</sup> when compared to  
225 GFP<sup>SP</sup>*CKX2*<sup>I</sup> (Figure 5C). Even though we cannot eliminate the possibility that N-  
226 terminal GFP may interfere with normal SP processing rates, the relative differences  
227 between the two assessed alleles suggests that the identified SNP impacts the SP  
228 cleavage in *CKX2*.

229 The SP processing is an important determinant of the mature protein and,  
230 hence, we examined the enzymatic *CKX2* activity in the presence and absence of the  
231 signal peptide. We expressed full length <sup>SP</sup>*CKX2*<sup>I</sup> and <sup>SP</sup>*CKX2*<sup>M</sup> as well as the SP-  
232 lacking counterparts <sup>-SP</sup>*CKX2*<sup>I</sup> and <sup>-SP</sup>*CKX2*<sup>M</sup> in *Escherichia coli* and measured their  
233 ability to oxidize CKs. Both SP-lacking forms <sup>-SP</sup>*CKX2*<sup>I</sup> and <sup>-SP</sup>*CKX2*<sup>M</sup> showed a 10-fold



234 higher activity compared to the SP containing versions (Figure 5D). This *in vitro* data  
235 suggests that SP processing is required to ensure full enzymatic activity of CKX2.

236 Next, to assess whether the T to G mutation also affects CKX2 activity *in planta*,  
237 we expressed full length *pCKX2::CKX2<sup>I</sup>* and *pCKX2::CKX2<sup>M</sup>* encoding versions in the  
238 *ckx2* mutant background. As expected, the wild-type (Col-0) *CKX2<sup>I</sup>* was able to fully  
239 complement the *ckx2* mutant phenotype (Figure 5E and Figure S5C). In contrast, the  
240 mutated *CKX2<sup>M</sup>* version was not able to reverse the reduced LR bending of *ckx2*  
241 mutants (Figure 5E and S5C). Overall, our data suggests that the T to G mutation  
242 found in natural accessions renders *CKX2* to be largely non-functional *in planta* by  
243 disrupting its secretion and/or SP processing.

244 Thus, we conclude that variation in SP processing of CKX2 contributes to the  
245 natural variation of CK-dependent angular LR growth in *Arabidopsis*.

246

### 247 **CKX2 does not detectably interfere with auxin signaling in emerged lateral roots**

248 Next, we investigated the cellular mechanism by which CKX2 activity modulates the  
249 primary GSA of LRs. We first inspected the spatial expression of *CKX2* to identify cells  
250 in which *CKX2* may directly regulate angular growth in LRs. *pCKX2::CKX2-  
251 mTurquoise* was weakly expressed in the tip of stage I LRs but showed increased  
252 expression in stage II and III LRs (Figure 6A). We confirmed that endogenous *CKX2*  
253 transcripts are strongly up-regulated in stage II and III LRs by examining expression in  
254 excised LR tissue using qPCR (Figure 6B). Notably, *pCKX2::CKX2-mTurquoise* was  
255 not detectable in the primary root tip (Figure 6B and S6A), proposing that CKX2 might  
256 specifically act in secondary root organs.

257 We next aimed to investigate how deviations in CKX2-dependent modulation of  
258 CK in LRs may modulate their directional growth. CKs signaling impairs PIN-  
259 dependent auxin transport in main roots as well as in lateral root primordia (Marhavý  
260 et al., 2011). We therefore assessed whether CKX2 activity regulates auxin transport  
261 in emerged LRs. Because PIN3 is the main regulator of asymmetric auxin redistribution  
262 in columella cells of emerged lateral roots (Rosquete et al., 2013), we initially assessed  
263 whether the *ckx2* mutant shows defective abundance or localization of functional  
264 pPIN3::PIN3-GFP in columella cells. At the time of GSA establishment (stage II LRs),  
265 PIN3-GFP abundance and asymmetry are not detectably altered from wild-type in *ckx2*  
266 mutants (Figure 6C and S6B). Next, we used the auxin responsive promoter DR5 fused  
267 to GFP and assess whether auxin signaling is affected in *ckx2* mutant LRs. In

268 accordance with proper PIN3 localization, DR5 signal intensity in columella cells and  
269 asymmetric signal in the flanks was similar in *ckx2* mutant and wild type LRs (Figure  
270 6D and S6C).

271 Overall, these data illustrate that auxin responses in gravitropic lateral roots are  
272 not detectably altered by CKX2, suggesting that CKX2 modulates angular growth by  
273 an alternative, CK-dependent mechanism in emerged LRs.

274

### 275 **Emerged lateral roots display asymmetric cytokinin signaling**

276 Our data indicates that CK regulates angular LR growth. To further assess the  
277 mechanism by which CK modulates GSA establishment in developing LRs, we  
278 visualized the spatial distribution of CK signaling using the two-component signaling  
279 sensor (TCSn) transcriptionally fused to GFP (TCSn::GFP) (Liu and Müller, 2017). We  
280 observed increased CK signaling on the upper side of stage II LRs, coinciding with  
281 gravitropic bending (Figure 6E). This asymmetry declined in stage III LRs, which  
282 maintain the previously established GSA (Figure 6E and S6D). In agreement with the  
283 anticipated reduction in CK degradation, the magnitude of asymmetric CK signaling  
284 was increased in *cxk2* mutant LRs (Figure 6F and S6D). Conversely, asymmetric CK  
285 signaling was reduced in the CK receptor double mutant *ahk2 ahk4* (Figure 6G and  
286 S6E). These data propose that the increased magnitude of asymmetry in CK signaling  
287 across the root tip correlates with reduced LR bending towards gravity.

288 To determine whether asymmetric CK signaling regulates bending specifically  
289 in LRs, we examined the distribution of CK signaling in primary roots responding to  
290 gravity. Importantly, we did not observe asymmetric CK signaling in unstimulated or  
291 gravity-stimulated primary roots (Figure S6F-G). Accordingly, we conclude that  
292 asymmetric CK signaling is specific to LRs and thus contributes to the distinct  
293 establishment of primary GSA in LRs. Previous work proposed a hypothetical  
294 gravitropic offset component at the upper flank of LRs. This envisioned component was  
295 presumably sensitive to the inhibition of auxin transport (Roychoudhry et al., 2013). To  
296 assess if auxin transport similarly modulates the asymmetry of CK signaling in  
297 emerged LRs, we treated seedlings with the auxin transport inhibitor 1-N-  
298 Naphthylphthalamic Acid (NPA). Pharmacological interference with auxin transport  
299 indeed markedly decreased asymmetric CK signaling in stage II LRs, when compared  
300 to the DMSO solvent control (Figure 6H and S6H), suggesting that auxin transport  
301 indeed impacts asymmetric CK signaling in emerged LRs.

302 In summary, our data suggests that asymmetric CK signaling at the upper flank  
303 of LRs functions as an anti-gravitropic component in emerged LRs to promote radial  
304 root growth.

305

### 306 **CKX2 activity determines cellular elongation in emerged lateral roots**

307 Light sheet-based live cell imaging has revealed that cells on the upper and lower  
308 flanks of emerged LRs show differential elongation for about 8-9 hours (Rosquete et  
309 al., 2013). During this developmental stage II, the cellular elongation rates at the upper  
310 epidermal layers is three-fold-increased compared to the lower flank (15 $\mu$ m/h versus  
311 5 $\mu$ m/h) (Rosquete et al., 2013). To test if this difference can account for the primary  
312 GSA establishment, we used these quantitative growth parameters to construct a  
313 dynamic computational model of LR bending (Figure 7A-D and S7A-D). This model  
314 incorporates cellular mechanics to simulate cell elongation using stretchable strings as  
315 a manifestation of the cell wall elasticity and internal turgor pressure in the cell (see  
316 method section). The anisotropic growth is simulated by extending the resting length  
317 of the spring to account for 3-fold differences in the growth rates between upper and  
318 lower flanks. The resulting model predicts that the incorporation of measured  
319 elongation rates on the upper LR flank is able to realistically recapitulate LR bending  
320 angle of wild type plants, reaching an angle of about 62-63° within 8-9 hours (Figure  
321 7B and Figure S7).

322 Next, we experimentally assessed whether the loss of *CKX2* or CK application  
323 interferes with cell elongation in stage II LRs. In agreement with reduced LR bending,  
324 the *ckx2* loss-of-function mutant, as well as wild type plants treated with BAP, showed  
325 shorter cells at the upper flank of stage II LRs when compared to the respective  
326 controls (Figure 7E and S7E). Our previous work revealed that differential elongation  
327 is a major factor controlling LR bending (Rosquete et al., 2013). However, the loss of  
328 *CKX2* reduced cell elongation in average only by ten percent. To evaluate whether the  
329 measured reduction in cell length can realize the observed quantitative changes in LR  
330 bending, we reduced cellular elongation similarly by ten percent in our computational  
331 LR model. The model predicted that *CKX2*-dependent impact on cellular elongation  
332 increases the predicted GSA of LRs within nine hours from 63° to only 68° (Figure 7C-  
333 D). Thus, we conclude that the impact of *CKX2* on cellular elongation cannot fully  
334 explain the observed reduction of LR bending in *ckx2* mutants.

335

336 **Cytokinin-dependent interference with cell division rates defines angular growth**  
337 **of lateral roots**

338 In primary roots, CK reduces not only cellular elongation, but also cell proliferation by  
339 distinct mechanisms (Ruzicka et al., 2007; Street et al., 2015). Moreover, our  
340 computational model predicts that the rate of LR bending could be restricted by the  
341 number of cells (Figure S7A-B). Thus, we tested if CK might also affect the meristem  
342 of LRs. The stage II LRs of *ckx2* loss-of-function mutant plants showed a significant  
343 reduction of meristem size at the upper LR flank compare to wild-type Col-0 (Figure  
344 7F). Similarly, BAP treatment resulted in the development of shorter meristems in stage  
345 II LRs of Col-0 wild-type (Figure S7F). These data suggest that CK signaling also  
346 negatively regulates meristem activity in emerged LRs.

347 We next used cell division marker *pCycB1;1::GUS*, to assess the spatial impact  
348 of CK on cell proliferation. BAP and INCYDE treatment reduced the abundance of  
349 *CycB1;1::GUS* at the upper flank of stage II LRs (Figure S7G-H). These data suggest  
350 that CK signaling does not only restrict cellular elongation, but also reduces cell  
351 proliferation in emerged LRs.

352 Notably, *CDKB1;1* and other cell cycle promoting genes are down-regulated in  
353 the *crf1,3,5,6* quadruple mutant (Raines et al., 2015). Hence, we assumed that CRF-  
354 dependent control of the cell cycle may contribute to the CK-mediated establishment  
355 of GSA in emerged LRs. To block cell cycle progression, we used the dominant  
356 negative (DN) allele of *CDKB1;1* and the *cdkb1;1 cdkb1;2* double mutant (Figure 7G),  
357 as well as the cell cycle inhibitor Roscovitine (Figure 7H). Both genetic and  
358 pharmacological interference with the cell cycle strongly interfered with the LR bending  
359 (Figure 7G-H). In contrast to LRs, the gravity response kinetics in primary roots of  
360 *CDKB1;1<sup>DN</sup>* as well as *cdkb1;1 cdkb1;2* were similar to wild-type behavior (Figure S7I).  
361 This suggests that not only cellular elongation (Rosquete et al., 2013), but also cell  
362 proliferation in stage II LRs is a particular determinant of directional LR growth.

363 Overall, these data suggest that CK modulates both differential cell elongation  
364 and cell proliferation to interfere with growth at the upper flank of LR, ultimately  
365 regulating angular LR growth and radial expansion of the root system.

366

367 **Discussion**

368 Because root systems are hidden beneath the soil, the study and directed improvement  
369 of root architectural traits in crop breeding programs have been delayed. There is

370 growing interest to alleviate the harmful effects of drought stress by modulating the  
371 primary GSA of LRs (Uga et al., 2013). Despite the apparent importance of the root  
372 system depth, the molecular mechanisms regulating the direction of LR growth are  
373 poorly understood. Thus, understanding the molecular mechanisms establishing the  
374 primary angular growth in LRs could guide future engineering of plants to suit certain  
375 habitats. Anticipating that natural variation could provide valuable insights on how to  
376 sustainably engineer root systems, we focused on the primary growth direction of  
377 lateral roots in natural *Arabidopsis* accessions.

378 We reveal that the primary growth direction of lateral roots varies substantially  
379 within a population of natural *Arabidopsis* accessions. Primary LR angles of hypo- or  
380 hyper-responsive accessions followed a similar trend regardless of whether they were  
381 grown in soil, two-dimensional or three-dimensional in-vitro systems. We thus conclude  
382 that this approach is suitable to assess the genetic control of angular LR growth. Using  
383 a GWAS approach, we show that angular growth of lateral roots is controlled by CKX2-  
384 dependent metabolism of the phytohormone cytokinin. CKX2 contains a SP to enter  
385 the secretory pathway, which could be crucial for its impact on CK perception.  
386 However, the precise site of CK receptor activity (plasma membrane and/or  
387 endoplasmic reticulum) is still under debate (Romanov et al., 2018). We conclude that  
388 variation in an amino acid substitution after the predicted cleavage site impacts on SP  
389 processing of CKX2, which consequently obstructs CKX2 activity *in planta*. Our data  
390 suggest that the lack of SP processing abolishes the secretion and enzymatic activity  
391 of CKX2, thereby contributing to CK-dependent GSA trait variation in natural  
392 *Arabidopsis* accessions.

393 Nordic accessions preferentially express an inactive *CKX2* variant, which  
394 prompted us to investigate whether environmental cues further define the root system  
395 in a CK-dependent manner. We revealed that hypoxic conditions induce more  
396 horizontal LR growth through CK signaling. The increased frequency of an inactive  
397 *CKX2* allele in Nordic accessions suggests that the allele may have been selected for  
398 in these populations, promoting more horizontal root growth. It is an intriguing  
399 possibility that more horizontal, near surface roots may rectify gas exchange under  
400 hypoxia conditions, potentially alleviating the harmful effects of hypoxic stress in these  
401 Nordic, snow covered habitats.

402 Our analysis suggests that primary and secondary roots have distinct responses  
403 to CK. While CK signaling abolishes PIN-dependent transport in main roots (Marhavý

404 et al., 2011), we showed that CKX2-dependent interference with endogenous CK  
405 levels does not affect PIN3 and auxin signaling in emerged LRs. Moreover, CK  
406 signaling is asymmetric in emerged lateral, but not primary roots, proposing a unique  
407 role of cytokinin in regulating asymmetric growth responses in LRs. Also abscisic acid  
408 signaling displays distinct activities in main and lateral root organs, presumably  
409 allowing distinct organ growth rates in response to environmental stresses (Ding and  
410 De Smet, 2013). Thus, we propose that hormone signaling might be generally co-opted  
411 in primary and secondary roots to facilitate different growth responses to the  
412 environment.

413         The increase and decrease of cytokinin levels have been shown to slightly  
414 accelerate the rate of gravitropic bending in primary root, but the developmental  
415 importance of this effect remains uncertain (Pernisova et al., 2016). In contrast, we  
416 show here that CK signaling plays a developmental role in establishing the primary  
417 GSA of LRs. Moreover, an increase and decrease of CK signaling correlate with  
418 reduced and enhanced down-ward bending of LRs, respectively. Mechanistically, we  
419 showed that CK signaling interferes with cellular elongation and proliferation in  
420 emerged LR to reduce LR organ bending towards gravity. These stage II LRs undergo  
421 a *de novo* formation of the elongation zone (Rosquete et al., 2013). During this  
422 developmental time window, the CK-dependent reduction in cell proliferation could  
423 have hence an immediate influence on the number of elongating cells. Such an impact  
424 could further compromise angular LR growth, because our computational model  
425 predicted that an asymmetric reduction in cell number (at the upper root flank) would  
426 induce mechanical constraints, additionally limiting organ bending (Figure S7C-D).  
427 However, such detailed mechanical constraint measurements in LRs await  
428 experimental validation.

429         We illustrate that CKX2 contributes to the rate of asymmetric CK signaling, but  
430 CKX2 expression did not show a pronounced asymmetry. Similarly, the CK response  
431 factors CRF2 and CRF3 are not asymmetrically expressed in emerged lateral roots.  
432 Thus, the molecular mechanism by which asymmetric CK signalling across the LR tip  
433 is established remains to be elucidated. Our work proposes that an auxin transport  
434 mechanism promotes the asymmetry of CK signaling. Accordingly, auxin could  
435 generate an anti-gravitropic signal to interfere with its own gravitropic impact in LRs.  
436 Unlike auxin, the mechanisms of intercellular cytokinin transport are poorly  
437 characterized (Kang et al., 2017). One intriguing possibility is however that the

438 asymmetric auxin signal could favor CK relocation towards the upper side of LR,  
439 inducing differential CK signalling and growth repression on this side. However, it is  
440 also possible that differential CK signaling occurs at the level of signal integration and  
441 might be independent of differential distribution of CK. Future work will examine these  
442 possibilities to uncover the mechanism by which CKX2 is linked to differential cytokinin  
443 activity across a stage II LR.

444 In conclusion, our genetic screen uncovered that directional LR growth depends  
445 on opposing gravitropic and anti-gravitropic phytohormonal cues (Figure S7J). We  
446 conclude that CK signaling reduces growth at the upper organ side, which counteracts  
447 the gravity induced, auxin-dependent reduction in cell expansion at the lower root flank.  
448 In this way, a CK-dependent mechanism allows the root system to override the  
449 gravitropic response and radially explore its surroundings. Genetic interference with  
450 CK signaling cannot only be used to define the primary growth direction of LR, but  
451 moreover may refract certain environmental input to root architecture. Overall, these  
452 results propose that directed interference with CK responses in LR could be used to  
453 engineer root system depth to better suit certain habitats.

454

## 455 **Acknowledgments**

456 We are grateful to Bruno Müller, Thomas Schmülling, Magnus Nordborg, Wolfgang  
457 Busch, Ben Scheres, Jiri Friml, Dirk Inze, Tomas Werner, Marketa Pernisova, Eva  
458 Benkova, Joseph Kieber and Lieven De Veylder for sharing published material; Marget  
459 Sauter, Ilka Reichardt-Gomez, Ümit Seren and Envel Kerdaffrec for helpful  
460 discussions; Jit Thacker for help with preparing the manuscript; Hana Martínková for  
461 help with phytohormone analyses; and the BOKU-VIBT Imaging Centre for access and  
462 expertise. This work was supported by the Austrian Academy of Sciences (ÖAW)  
463 (DOC fellowship to K.D.), Fulbright-Austria Marshall Plan student grant (to E.S.),  
464 Vienna Research Group (VRG) program of the Vienna Science and Technology Fund  
465 (WWTF) (to J.K-V.), the Austrian Science Fund (FWF) (P29754) (to J.K-V.), the  
466 European Research Council (ERC) (Starting Grant 639478-AuxinER) (to J.K-V.), and  
467 work was funded by the Ministry of Education, Youth and Sports of the Czech Republic  
468 (National Program for Sustainability I, grant no. LO1204) (to O.N.), and Programa de  
469 Atracción de Talento 2017 (Comunidad de Madrid, 2017-T1/BIO-5654 to K.W.).

470

## 471 **Author contributions**

472 S.W. performed most experiments. M.R.R. initiated the project. M.S., E.S. and K.D.  
473 performed confocal microscopy. H.L., T.L.R. and J.R.D. contributed GLO-Roots data.  
474 I.P. and O.N. conducted quantification of endogenous cytokinins. S.M. and R.S.  
475 performed hypoxia experiments K.W. designed and described the dynamic computer  
476 model simulation. J.K.-V. devised and coordinated the project. S.W. and J.K.-V. wrote  
477 the manuscript. All authors saw and commented on the manuscript.

478

## 479 **Competing interests**

480 The authors declare no competing financial interests.

481

## 482 **References**

483 Antoniadi, I., Plačková, L., Simonovik, B., Doležal, K., Turnbull, C., Ljung, K., and  
484 Novák, O. (2015). Cell-Type-Specific Cytokinin Distribution within the Arabidopsis  
485 Primary Root Apex. *Plant Cell* 27, 1955–1967.

486 Bartrina, I., Otto, E., Strnad, M., Werner, T., and Schmülling, T. (2011). Cytokinin  
487 Regulates the Activity of Reproductive Meristems, Flower Organ Size, Ovule  
488 Formation, and Thus Seed Yield in Arabidopsis thaliana. *Plant Cell* 23, 69–80.

489 Boudolf, V. (2004). The Plant-Specific Cyclin-Dependent Kinase CDKB1;1 and  
490 Transcription Factor E2Fa-DPa Control the Balance of Mitotically Dividing and  
491 Endoreduplicating Cells in Arabidopsis. *The Plant Cell Online* 16, 2683–2692.

492 Clough, S.J., and Bent, A.F. (1998). Floral dip: a simplified method for Agrobacterium-  
493 mediated transformation of Arabidopsis thaliana. *Plant J.* 16, 735–743.

494 Crone, D., Rueda, J., Martin, K.L., Hamilton, D.A., and Mascarenhas, J.P. (2001). The  
495 differential expression of a heat shock promoter in floral and reproductive tissues. *Plant*  
496 *Cell Environ.* 24, 869–874.

497 Digby, J., and Firn, R.D. (1995). The gravitropic set-point angle (GSA): the  
498 identification of an important developmentally controlled variable governing plant  
499 architecture. *Plant Cell Environ.* 18, 1434–1440.

500 Ding, Z., and De Smet, I. (2013). Localised ABA signalling mediates root growth  
501 plasticity. *Trends in Plant Science* 18, 533–535.

502 Duncan, S., Holm, S., Questa, J., Irwin, J., Grant, A., and Dean, C. (2015). Seasonal  
503 shift in timing of vernalization as an adaptation to extreme winter. *Elife* 4, 11632.

504 Eysholdt-Derzsó, E., and Sauter, M. (2017). Root Bending Is Antagonistically Affected  
505 by Hypoxia and ERF-Mediated Transcription via Auxin Signaling. *Plant Physiology*  
506 175, 412–423.



- 507 Ferreira, P.C., Hemerly, A.S., Engler, J.D., van Montagu, M., Engler, G., and Inzé, D.  
508 (1994). Developmental expression of the arabidopsis cyclin gene *cyc1At*. *The Plant*  
509 *Cell Online* 6, 1763–1774.
- 510 Frébort, I., Šebela, M., Galuszka, P., Werner, T., Schmülling, T., and Pec, P. (2002).  
511 Cytokinin Oxidase/Cytokinin Dehydrogenase Assay: Optimized Procedures and  
512 Applications. *Anal. Biochem.* 306, 1–7.
- 513 Friml, J., Vieten, A., Sauer, M., Weijers, D., Schwarz, H., Hamann, T., Offringa, R., and  
514 Jürgens, G. (2003). Efflux-dependent auxin gradients establish the apical-basal axis of  
515 *Arabidopsis*. *Nature* 426, 147–153.
- 516 Friml, J., Wiśniewska, J., Benková, E., Mendgen, K., and Palme, K. (2002). Lateral  
517 relocation of auxin efflux regulator PIN3 mediates tropism in *Arabidopsis*. *Nature* 415,  
518 806–809.
- 519 Guyomarc'h, S., Leran, S., Auzon-Cape, M., Perrine-Walker, F., Lucas, M., and  
520 Laplaze, L. (2012). Early development and gravitropic response of lateral roots in  
521 *Arabidopsis thaliana*. *Philosophical Transactions of the Royal Society B: Biological*  
522 *Sciences* 367, 1509–1516.
- 523 Hofmann, F., Schon, M.A., and Nodine, M.D. (2019). The embryonic transcriptome of  
524 *Arabidopsis thaliana*. *Plant Reproduction* 1–15.
- 525 Hoyerová, K., Gaudinová, A., Malbeck, J., Dobrev, P.I., Kocábek, T., Solcová, B.,  
526 Trávníčková, A., and Kamínek, M. (2006). Efficiency of different methods of extraction  
527 and purification of cytokinins. *Phytochemistry* 67, 1151–1159.
- 528 Inoue, T., Higuchi, M., Hashimoto, Y., Seki, M., Kobayashi, M., Kato, T., Tabata, S.,  
529 Shinozaki, K., and Kakimoto, T. (2001). Identification of CRE1 as a cytokinin receptor  
530 from *Arabidopsis*. *Nature* 409, 1060–1063.
- 531 Ioio, Dello, R., Nakamura, K., Moubayidin, L., Perilli, S., Taniguchi, M., Morita, M.T.,  
532 Aoyama, T., Costantino, P., and Sabatini, S. (2008). A genetic framework for the  
533 control of cell division and differentiation in the root meristem. *Science* 322, 1380–  
534 1384.
- 535 Jeon, J., Cho, C., Lee, M.R., Van Binh, N., and Kim, J. (2016). CYTOKININ  
536 RESPONSE FACTOR2( CRF2) and CRF3Regulate Lateral Root Development in  
537 Response to Cold Stress in *Arabidopsis*. *The Plant Cell Online* 28, 1828–1843.
- 538 Kang, J., Lee, Y., Sakakibara, H., and Martinoia, E. (2017). Cytokinin Transporters:  
539 GO and STOP in Signaling. *Trends in Plant Science* 22, 455–461.
- 540 Karwowski, R. The L-system-based plant-modeling environment L-studio 4.0. In  
541 Proceedings of the 4th International Workshop on Functional-Structural Plant Models  
542 403–405.
- 543 Kleine-Vehn, J., Ding, Z., Jones, A.R., Tasaka, M., Morita, M.T., and Friml, J. (2010).  
544 Gravity-induced PIN transcytosis for polarization of auxin fluxes in gravity-sensing root  
545 cells. *Proc. Natl. Acad. Sci. U.S.a.* 107, 22344–22349.
- 546 Leitz, G., Kang, B.H., Schoenwaelder, M.E.A., and Staehelin, L.A. (2009). Statolith

- 547 Sedimentation Kinetics and Force Transduction to the Cortical Endoplasmic Reticulum  
548 in Gravity-Sensing Arabidopsis Columella Cells. *The Plant Cell Online* 21, 843–860.
- 549 Liu, J., and Müller, B. (2017). Imaging TCSn::GFP, a Synthetic Cytokinin Reporter, in  
550 Arabidopsis thaliana. *Methods Mol. Biol.* 1497, 81–90.
- 551 Marhavý, P., Bielach, A., Abas, L., Abuzeineh, A., Duclercq, J., Tanaka, H., Pařezová,  
552 M., Petrášek, J., Friml, J., Kleine-Vehn, J., et al. (2011). Cytokinin Modulates Endocytic  
553 Trafficking of PIN1 Auxin Efflux Carrier to Control Plant Organogenesis.  
554 *Developmental Cell* 21, 796–804.
- 555 Martz, F., Vuosku, J., Ovaskainen, A., Stark, S., and Rautio, P. (2016). The Snow Must  
556 Go On: Ground Ice Encasement, Snow Compaction and Absence of Snow Differently  
557 Cause Soil Hypoxia, CO<sub>2</sub> Accumulation and Tree Seedling Damage in Boreal Forest.  
558 *PLoS ONE* 11, e0156620–18.
- 559 Mullen, J.L., and Hangarter, R.P. (2003). Genetic analysis of the gravitropic set-point  
560 angle in lateral roots of Arabidopsis. *Adv Space Res* 31, 2229–2236.
- 561 Pernisova, M., Grochova, M., Konecny, T., Plačková, L., Harustiakova, D., Kakimoto,  
562 T., Heisler, M.G., Novák, O., and Hejatko, J. (2018). Cytokinin signalling regulates  
563 organ identity via the AHK4 receptor in Arabidopsis. *Development* 145, dev163907–  
564 dev163948.
- 565 Pernisova, M., Prat, T., Grones, P., Harustiakova, D., Matonohova, M., Spíchal, L.,  
566 Nodzynski, T., Friml, J., and Hejatko, J. (2016). Cytokinins influence root gravitropism  
567 via differential regulation of auxin transporter expression and localization in  
568 Arabidopsis. *New Phytologist* 212, 497–509.
- 569 Raines, T., Shanks, C., Cheng, C.-Y., McPherson, D., Argueso, C.T., Kim, H.J.,  
570 Franco-Zorrilla, J.M., López-Vidriero, I., Solano, R., Vaňková, R., et al. (2015). The  
571 cytokinin response factors modulate root and shoot growth and promote leaf  
572 senescence in Arabidopsis. *The Plant Journal* 85, 134–147.
- 573 Rellán-Álvarez, R., Lobet, G., Lindner, H., Pradier, P.-L., Sebastian, J., Yee, M.-C.,  
574 Geng, Y., Trontin, C., LaRue, T., Schrager-Lavelle, A., et al. (2015). GLO-Roots: an  
575 imaging platform enabling multidimensional characterization of soil-grown root  
576 systems. *Elife* 4.
- 577 Riefler, M. (2006). Arabidopsis Cytokinin Receptor Mutants Reveal Functions in Shoot  
578 Growth, Leaf Senescence, Seed Size, Germination, Root Development, and Cytokinin  
579 Metabolism. *The Plant Cell Online* 18, 40–54.
- 580 Romanov, G.A., Lomin, S.N., and Schmölling, T. (2018). Cytokinin signaling: from the  
581 ER or from the PM? That is the question! *New Phytol.* 218, 41–53.
- 582 Rosquete, M.R., Wangenheim, von, D., Marhavý, P., Barbez, E., Stelzer, E.H.K.,  
583 Benková, E., Maizel, A., and Kleine-Vehn, J. (2013). An Auxin Transport Mechanism  
584 Restricts Positive Orthogravitropism in Lateral Roots. *Current Biology* 23, 817–822.
- 585 Roychoudhry, S., Del Bianco, M., Kieffer, M., and Kepinski, S. (2013). Auxin Controls  
586 Gravitropic Setpoint Angle in Higher Plant Lateral Branches. *Current Biology* 23, 1497–  
587 1504.

- 588 Ruiz Rosquete, M., Waidmann, S., and Kleine-Vehn, J. (2018). PIN7 Auxin Carrier Has  
589 a Preferential Role in Terminating Radial Root Expansion in *Arabidopsis thaliana*. *Int*  
590 *J Mol Sci* *19*.
- 591 Ruzicka, K., Ljung, K., Vanneste, S., Podhorska, R., Beeckman, T., Friml, J., and  
592 Benkova, E. (2007). Ethylene Regulates Root Growth through Effects on Auxin  
593 Biosynthesis and Transport-Dependent Auxin Distribution. *The Plant Cell Online* *19*,  
594 2197–2212.
- 595 Samalova, M., Fricker, M., and Moore, I. (2006). Ratiometric fluorescence-imaging  
596 assays of plant membrane traffic using polyproteins. *Traffic* *7*, 1701–1723.
- 597 Schmülling, T., Werner, T., Riefler, M., Krupková, E., and Bartrina y Manns, I. (2003).  
598 Structure and function of cytokinin oxidase/dehydrogenase genes of maize, rice,  
599 *Arabidopsis* and other species. *J Plant Res* *116*, 241–252.
- 600 Schöller, M., Kleine-Vehn, J., and Feraru, E. (2018). Cortical Cell Length Analysis  
601 During Gravitropic Root Growth. *Methods Mol. Biol.* *1761*, 191–197.
- 602 Seren, Ü., Vilhjálmsón, B.J., Horton, M.W., Meng, D., Forai, P., Huang, Y.S., Long,  
603 Q., Segura, V., and Nordborg, M. (2012). GWAPP: a web application for genome-wide  
604 association mapping in *Arabidopsis*. *Plant Cell* *24*, 4793–4805.
- 605 Skylar, A., Hong, F., Chory, J., Weigel, D., and Wu, X. (2010). STIMPY mediates  
606 cytokinin signaling during shoot meristem establishment in *Arabidopsis* seedlings.  
607 *Development* *137*, 541–549.
- 608 Smith, C., Prusinkiewicz, P., and Samavati, F. (2003). Local Specification of Surface  
609 Subdivision Algorithms. In *Applications of Graph Transformations with Industrial*  
610 *Relevance*, (Berlin, Heidelberg: Springer, Berlin, Heidelberg), pp. 313–327.
- 611 Smith, R.S., Guyomarc'h, S., Mandel, T., Reinhardt, D., Kuhlemeier, C., and  
612 Prusinkiewicz, P. (2006). A plausible model of phyllotaxis. *Proc Natl Acad Sci USA*  
613 *103*, 1301–1306.
- 614 Street, I.H., Aman, S., Zubo, Y., Ramzan, A., Wang, X., Shakeel, S.N., Kieber, J.J.,  
615 and Schaller, G.E. (2015). Ethylene Inhibits Cell Proliferation of the *Arabidopsis* Root  
616 Meristem. *Plant Physiology* *169*, 338–350.
- 617 Su, S.-H., Gibbs, N.M., Jancewicz, A.L., and Masson, P.H. (2017). Molecular  
618 Mechanisms of Root Gravitropism. *Current Biology* *27*, R964–R972.
- 619 Svačinová, J., Novák, O., Plačková, L., Lenobel, R., Holík, J., Strnad, M., and Doležal,  
620 K. (2012). A new approach for cytokinin isolation from *Arabidopsis* tissues using  
621 miniaturized purification: pipette tip solid-phase extraction. *Plant Methods* *8*, 17.
- 622 Šimášková, M., O'Brien, J.A., Khan, M., Van Noorden, G., Ötvös, K., Vieten, A., De  
623 Clercq, I., Van Haperen, J.M.A., Cuesta, C., Hoyerová, K., et al. (2015). Cytokinin  
624 response factors regulate PIN-FORMED auxin transporters. *Nature Communications*  
625 *6*, 8717.
- 626 To, J.P.C., Haberer, G., Ferreira, F.J., Deruère, J., Mason, M.G., Schaller, G.E.,  
627 Alonso, J.M., Ecker, J.R., and Kieber, J.J. (2004). Type-A *Arabidopsis* response

- 628 regulators are partially redundant negative regulators of cytokinin signaling. *The Plant*  
629 *Cell Online* 16, 658–671.
- 630 Uga, Y., Sugimoto, K., Ogawa, S., Rane, J., Ishitani, M., Hara, N., Kitomi, Y., Inukai,  
631 Y., Ono, K., Kanno, N., et al. (2013). Control of root system architecture by DEEPER  
632 ROOTING 1 increases rice yield under drought conditions. *Nature Publishing Group*  
633 45, 1097–1102.
- 634 Werner, T. (2003). Cytokinin-Deficient Transgenic Arabidopsis Plants Show Multiple  
635 Developmental Alterations Indicating Opposite Functions of Cytokinins in the  
636 Regulation of Shoot and Root Meristem Activity. *Plant Cell* 15, 2532–2550.
- 637 Wickham, H. (2016). ggplot2 (Springer International Publishing).
- 638 Xie, Z., Lee, E., Lucas, J.R., Morohashi, K., Li, D., Murray, J.A.H., Sack, F.D., and  
639 Grotewold, E. (2010). Regulation of Cell Proliferation in the Stomatal Lineage by the  
640 Arabidopsis MYB FOUR LIPS via Direct Targeting of Core Cell Cycle Genes. *The Plant*  
641 *Cell Online* 22, 2306–2321.
- 642 Zadnikova, P., Petrasek, J., Marhavy, P., Raz, V., Vandenbussche, F., Ding, Z.,  
643 Schwarzerova, K., Morita, M.T., Tasaka, M., Hejatko, J., et al. (2010). Role of PIN-  
644 mediated auxin efflux in apical hook development of Arabidopsis thaliana.  
645 *Development* 137, 607–617.
- 646 Zatloukal, M., Gemrotová, M., Doležal, K., Havlíček, L., Spíchal, L., and Strnad, M.  
647 (2008). Novel potent inhibitors of A. thaliana cytokinin oxidase/dehydrogenase.  
648 *Bioorganic & Medicinal Chemistry* 16, 9268–9275.

649

## 650 **Figure Legends**

651

### 652 **Figure 1. Natural variation of the primary GSA of lateral roots in *Arabidopsis*** 653 ***thaliana*.**

654 (A) Geographical distribution of natural *Arabidopsis thaliana* accessions used in this  
655 study.

656 (B) Mean gravitropic set point angle (GSA) values are normalized to reference  
657 accession Col-0. Three representative hyper- (blue colours) and hypo-responsive (red  
658 colours) accessions were selected for further analysis.

659 (C) Representative images and GSA distributions of hyper- and hypo-responsive  
660 accessions grown on 2D agar plates. n = 5 plates (16 seedlings with 100-160 LRs per  
661 plate), Scale bars, 20 mm.

662 (D) GSA distribution of hyper- and hypo-responsive accessions grown in 3D agar  
663 cylinders. n = 5 cylinders (20-40 LRs per cylinder).

664 (E) GSA distribution of hyper- and hypo-responsive accessions grown in soil.  $n = 5-10$   
665 plants (20-40 LR<sub>s</sub> per plant).

666 (C)-(D) Kolmogorov-Smirnov test P-values: \*  $P < 0.05$ , \*\*  $P < 0.01$ , \*\*\*  $P < 0.001$   
667 (compared to Col-0). Mean  $\pm$  SEM. Experiments were repeated at least three times.

668

669 **Figure 2. Genome-wide association study (GWAS) on gravitropic set point angle**  
670 **(GSA).**

671 (A) Manhattan plot of GWAS results. The dotted horizontal line indicates a significance  
672 level of 0.1 after Bonferroni correction for multiple testing.

673 (B) Magnification of the peak region on chromosome 2. A highly significant SNP was  
674 located at position 8,447,233 in the coding region of *CKX2*.

675 (C) Mean GSA of T and G allele of *CKX2*. Horizontal lines show the medians; box limits  
676 indicate the 25th and 75th percentiles; whiskers extend to the min and max values.  
677 Student's t-test p-value: \*\*\*  $P < 0.001$ .

678 (D)-(G) Representative images and GSA distributions of untreated and 6-  
679 Benzylaminopurin (BAP)-treated Col-0 wild type (D), Col-0 wild type, *ahk2 ahk3*, *ahk2*  
680 *ahk4* and *ahk3 ahk4* (E), untreated and INCYDE-treated Col-0 wild type (F), Col-0 wild  
681 type, *ckx2-1* and *CKX2<sup>OX</sup>* seedlings (G). Kolmogorov-Smirnov test P-values: \*  $P <$   
682  $0.05$ , \*\*  $P < 0.01$ , \*\*\*  $P < 0.001$  (compared to DMSO solvent or Col-0 wild type control).  
683 Mean  $\pm$  SEM,  $n = 5$  plates (16 seedlings with 100-160 LR<sub>s</sub> per plate). Scale bars, 2  
684 mm.

685 (D)-(G) Experiments were repeated at least three times.

686

687 **Figure 3. Characterization of Cytokinin Response Factors (CRFs) in lateral roots.**

688 (A) Representative images of pCRF2::GFP/GUS and pCRF3::GFP/GUS in stage I – III  
689 LR<sub>s</sub>. Scale bar, 25  $\mu$ M.

690 (B) Representative images and GSA distribution of Col-0 wild type, *crf* mutants and  
691 *CRF<sup>OX</sup>* lines. Kolmogorov-Smirnov test P-values: \*\*\*  $P < 0.001$  (compared to DMSO  
692 or Col-0, respectively). Mean  $\pm$  SEM,  $n = 5$  plates (16 seedlings with 80-100 LR<sub>s</sub> per  
693 plate). Scale bars, 2 mm.

694 (A)-(B) Experiments were repeated at least three times.

695

696 **Figure 4. Cytokinin signalling integrates environmental signals into angular**  
697 **lateral root growth.**

698 (A) Comparison of the mean GSA distribution and its geographical (latitude)  
699 distribution of the phenotyped accessions. T and G allele of CKX2 are depicted in blue  
700 and green, respectively.  
701 (B) Relative geographical distribution (color coded by yellow (low) to red (high number))  
702 of the T and G allele of CKX2 in all sequenced Swedish Arabidopsis accessions.  
703 (C)-(D) Representative images and GSA distributions of (C) Col-0 wild-type and *ckx2-*  
704 *1* or (D) Col-0 wild type and *ahk2 ahk4* with and without hypoxia treatment for 4h. Scale  
705 bars, 2 mm. Kolmogorov-Smirnov test P-values: \*\*\*  $P < 0.001$  (compared to DMSO  
706 solvent or Col-0 wild type control). Mean  $\pm$  SEM.,  $n = 4$  plates (10 seedlings with 80-  
707 100 LRs per plate). Experiments were repeated at least three times.

708

709 **Figure 5. Signal Peptide processing is required for CKX2 activity.**

710 (A) Localization of GFP-<sup>SP</sup>CKX2<sup>I</sup>-mScarlet and GFP-<sup>SP</sup>CKX2<sup>M</sup>-mScarlet in stage II  
711 LR. Scale bar, 25  $\mu$ m and 10  $\mu$ m, respectively.  
712 (B) Quantification of the co-localization of GFP and mScarlet signal using Pearson's  
713 correlation. Horizontal lines show the medians; box limits indicate the 25th and 75th  
714 percentiles; whiskers extend to the min and max values. Student's t-test P-Value: \*\*\*  
715  $P < 0.001$ ,  $n = 10-15$  individual LR.  
716 (C) Immunoblot analysis and quantification of <sup>SP</sup>CKX2<sup>I</sup> and <sup>SP</sup>CKX2<sup>M</sup> expressed in *N.*  
717 *tabacum* leaves using anti-GFP antibody. Anti-tubulin antibody was used as loading  
718 control. The signal of GFP-SP was quantified and normalized to tubulin. Student's t-  
719 test P-Value: \*\*\*  $P < 0.001$ . Mean  $\pm$  SEM,  $n = 8$  biological replicates.  
720 (D) Saturation curves of isopentenyladenine (iP) degradation by CKX2. Reactions  
721 were performed at pH 7.4 in McIlvaine buffer with 0.5 mM DCIP as electron acceptor  
722 (-●- <sup>SP</sup>CKX2<sup>I</sup>, -□- <sup>SP</sup>CKX2<sup>M</sup>, -▲- <sup>-SP</sup>CKX2<sup>I</sup>, -◇- <sup>-SP</sup>CKX2<sup>M</sup>). Mean  $\pm$  SEM,  $n = 8$ .  
723 (E) GSA distributions of *ckx2-1* was complemented by CKX2::CKX2<sup>I</sup>, but not by  
724 CKX2::CKX2<sup>M</sup>. Representative lines are shown. Kolmogorov-Smirnov test P-value: \*\*\*  
725  $P < 0.001$  (compared to Col-0). Mean  $\pm$  SEM,  $n = 5$  plates (16 seedlings with 100-160  
726 LR per plate).  
727 (A)-(E) Experiments were repeated at least three times.

728

729 **Figure 6. CKX2 modulates asymmetric cytokinin signalling in emerged lateral**  
730 **roots.**

731 (A) Representative images of pCKX2::CKX2-mTurquoise in stage I – III LRs.  
732 Propidium Iodide (PI) was used for counterstaining. Scale bar, 25  $\mu$ m.  
733 (B) qPCR analysis detecting the levels of *CKX2* transcript in the root tip and LRs stage  
734 I-III normalized against *UBQ5* and *EIF4*. Bars represent means  $\pm$  SD, n = 3.  
735 (C)-(D) Representative images and signal quantification of stage II LRs of (C)  
736 PIN3::PIN3-GFP, and (D) DR5::GFP in Col-0 wild type and *ckx2-1* mutant background.  
737 Horizontal lines show the medians; box limits indicate the 25th and 75th percentiles;  
738 whiskers extend to the min and max values, n = 10-15 individual LRs. White dotted  
739 lines outline lateral root cap cells (facing the columella cells) for quantification. Scale  
740 bars, 10  $\mu$ m.  
741 (E) Representative image (stage II) and quantification of TCSn::GFP in stages I – III  
742 LRs. PI was used for counterstaining. Scale bar, 50  $\mu$ m.  
743 (F)-(G) Representative images and quantification of stage II LRs of (F) TCSn::GFP in  
744 wild type and *ckx2-1*, (G) TCSn::GFP in wild type and *ahk2 ahk4* or (D) after treatment  
745 with DMSO or 1  $\mu$ M NPA for 24h. Scale bars, 10  $\mu$ m. One-way ANOVA P-values: \* P  
746 < 0.05, \*\* P < 0.01, \*\*\* P < 0.001. Horizontal lines show the medians; box limits indicate  
747 the 25th and 75th percentiles; whiskers extend to the min and max values, n = 10-15  
748 individual LRs.  
749 (A)-(G) Experiments were repeated at least three times.

750

751 **Figure 7. Cytokinin-dependent interference with cell cycle defines angular**  
752 **growth of lateral roots.**

753 (A) Sketch shows a simplified geometry of lateral root (LR), representing the root tip  
754 and the elongation zone. The cell elongation rate (visualized as red spot inside the cell)  
755 gradually increases from lower towards the upper side of the LR (~ 3-fold) based on  
756 estimates derived from previous work (Rosquete et al., 2013). Bottom panel, color  
757 coding bar for cell elongation rates.  
758 (B) Time-lapse model simulations, considering 9 elongating cells establishing LR  
759 bending (63°) after approximately 9h.  
760 (C) left control panel (corresponds to (B)) is compared to right panel showing a 10%  
761 decrease in elongation rate on the upper root flank. Each simulation represents LR  
762 status after 8h of dynamic elongation.  
763 (D) Time evolution of set-point angle corresponding to (C), color of curves matches  
764 simulation with the color bar shown in (C).

765 (E)-(F) Representative image and quantification of (E) first two elongated cells of lateral  
 766 roots in stages II and (F) lateral root meristem. One-way ANOVA P-values: \*\* P < 0.01,  
 767 \*\*\* P < 0.001. Horizontal lines show the medians; box limits indicate the 25th and 75th  
 768 percentiles; whiskers extend to the min and max values, n = 10-15 individual LRs.  
 769 Scale bar, 10  $\mu$ m.

770 (G)-(H) Representative images and GSA distributions of (D) Col-0 wild-type, CDKB1;1  
 771 DN (dominant negative) and *cdkb1;1 cdkb1;2* or (E) Roscovitine treated Col-0 wild-type  
 772 seedlings. Kolmogorov-Smirnov test P-values: \*\* P < 0.01, \*\*\* P < 0.001 (compared to  
 773 Col-0). Mean  $\pm$  SEM, n = 5 plates (16 seedlings with 60-80 LRs per plate). Scale bars,  
 774 2 mm.

775 (E)-(H) Experiments were repeated at least three times.

776

## 777 Material and methods

### 778 KEY RESOURCES TABLE

| REAGENT or RESOURCE                                  | SOURCE                   | IDENTIFIER    |
|------------------------------------------------------|--------------------------|---------------|
| <b>Antibodies</b>                                    |                          |               |
| GFP antibody                                         | abcam                    | ab290         |
| IRDye 800CW anti-mouse                               | LI-COR                   | #926-32210    |
| IRDye 800 CW anti-rabbit                             | LI-COR                   | #926-32211    |
| Tubulin antibody                                     | Sigma                    | T6074         |
| <b>Bacterial and Virus Strains</b>                   |                          |               |
| <i>Agrobacterium tumefaciens</i> GV3101              | N/A                      | N/A           |
| <i>Escherichia coli</i> DH10                         | N/A                      | N/A           |
| <i>Escherichia coli</i> BL21                         | N/A                      | N/A           |
| <b>Chemicals, Peptides, and Recombinant Proteins</b> |                          |               |
| 2,6-dichlorophenol indophenol (DCPIP)                | Sigma                    | 119814        |
| 2-chloro-6-(3-methoxyphenyl)aminopurine (INCYDE)     | (Zatloukal et al., 2008) | N/A           |
| 2x Takyon for SYBR Assay – no ROX                    | Eurogentec               | UF-NSMT-B0710 |
| 4-aminophenol                                        | Sigma                    | A71328        |
| 6-Benzylaminopurin (BAP)                             | Sigma                    | 13151         |
| D-luciferin                                          | Biosynth                 | L8282         |
| DMSO                                                 | Duchefa                  | D1370         |
| Gibson Assembly Master Mix                           | NEB                      | E2611L        |
| Glutathione Sepharose 4B                             | GE Healthcare            | 17-0756-01    |
| GlycoBlue                                            | Thermo Fisher            | AM9515        |
| GST- <sup>SP</sup> CKX2 <sup>I</sup>                 | This Paper               | N/A           |
| GST- <sup>SP</sup> CKX2 <sup>M</sup>                 | This Paper               | N/A           |
| GST- <sup>SP</sup> CKX2 <sup>I</sup>                 | This Paper               | N/A           |
| GST- <sup>SP</sup> CKX2 <sup>M</sup>                 | This Paper               | N/A           |
| Murashige and Skoog medium                           | Duchefa                  | M0221.0050    |
| N6-(2-Isopentenyl)Adenine (iP)                       | Sigma/Olchemim           | D5912/030161  |
| Protease Inhibitor Cocktail                          | Roche                    | 11836170001   |
| RNALater                                             | Thermo Fisher            | AM7070        |
| SuperScript II                                       | Thermo Fisher            | 18064014      |
| trans-Zeatin (tZ)                                    | Olchemim                 | 0010301       |



|                                                                        |                          |                                                                                                                           |
|------------------------------------------------------------------------|--------------------------|---------------------------------------------------------------------------------------------------------------------------|
| Trizol                                                                 | Sigma                    | 93289                                                                                                                     |
| Q5 High-Fidelity DNA Polymerase                                        | NEB                      | M0491M                                                                                                                    |
| X-Gluc                                                                 | Carl Roth                | 0018.3                                                                                                                    |
| Deposited Data                                                         |                          |                                                                                                                           |
| GWAS data                                                              | This paper               | <a href="https://gwas.gmi.oeaw.ac.at/#/analysis/12722/overview">https://gwas.gmi.oeaw.ac.at/#/analysis/12722/overview</a> |
| Experimental Models: Organisms/Strains                                 |                          |                                                                                                                           |
| <i>Arabidopsis</i> : WT Col-0                                          | N/A                      | N/A                                                                                                                       |
| <i>Arabidopsis</i> accessions listed in Table S1                       | GMI Vienna               | See Table S1                                                                                                              |
| <i>Arabidopsis</i> : <i>ahk2-5</i>                                     | (Riefler, 2006)          | <a href="#">SAIL 575 E05</a>                                                                                              |
| <i>Arabidopsis</i> : <i>ahk3-7</i>                                     | (Riefler, 2006)          | <a href="#">GK 105 E02</a>                                                                                                |
| <i>Arabidopsis</i> : <i>ahk4 (cre1-2)</i>                              | (Inoue et al., 2001)     | N/A                                                                                                                       |
| <i>Arabidopsis</i> : <i>ahk2-5 ahk3-7</i>                              | (Riefler, 2006)          | See above                                                                                                                 |
| <i>Arabidopsis</i> : <i>ahk2-5 ahk4</i>                                | (Riefler, 2006)          | See above                                                                                                                 |
| <i>Arabidopsis</i> : <i>ahk3-7 ahk4</i>                                | (Riefler, 2006)          | See above                                                                                                                 |
| <i>Arabidopsis</i> : <i>arr3</i>                                       | (To et al., 2004)        | <a href="#">CS25265</a>                                                                                                   |
| <i>Arabidopsis</i> : <i>pARR3::GUS</i>                                 | (To et al., 2004)        | <a href="#">CS25259</a>                                                                                                   |
| <i>Arabidopsis</i> : <i>arr4</i>                                       | (To et al., 2004)        | <a href="#">CS26266</a>                                                                                                   |
| <i>Arabidopsis</i> : <i>pARR4::GUS</i>                                 | (To et al., 2004)        | <a href="#">CS25260</a>                                                                                                   |
| <i>Arabidopsis</i> : <i>CDKB1;1 DN</i>                                 | (Boudolf, 2004)          | N/A                                                                                                                       |
| <i>Arabidopsis</i> : <i>cdkb1;1 cdkb1;2</i>                            | (Xie et al., 2010)       | SALK_073457,<br>SALK_133560<br>( <a href="#">CS66145</a> )                                                                |
| <i>Arabidopsis</i> : <i>35S::CKX1</i>                                  | (Werner, 2003)           | N/A                                                                                                                       |
| <i>Arabidopsis</i> : <i>ckx2-1</i>                                     | (Bartrina et al., 2011)  | <a href="#">SALK 068485</a>                                                                                               |
| <i>Arabidopsis</i> : <i>35S::CKX2</i>                                  | (Werner, 2003)           | N/A                                                                                                                       |
| <i>Arabidopsis</i> : <i>ckx3-1</i>                                     | (Bartrina et al., 2011)  | <a href="#">SALK 050938</a>                                                                                               |
| <i>Arabidopsis</i> : <i>35S::CKX3</i>                                  | (Werner, 2003)           | N/A                                                                                                                       |
| <i>Arabidopsis</i> : <i>ckx2-1 + pCKX2::CKX2<sup>I</sup></i>           | This paper               | N/A                                                                                                                       |
| <i>Arabidopsis</i> : <i>ckx2-1 + pCKX2::CKX2<sup>M</sup></i>           | This paper               | N/A                                                                                                                       |
| <i>Arabidopsis</i> : <i>Col-0 + pCKX2::CKX2<sup>I</sup></i>            | This paper               | N/A                                                                                                                       |
| <i>Arabidopsis</i> : <i>Col-0 + pCKX2::CKX2<sup>M</sup></i>            | This paper               | N/A                                                                                                                       |
| <i>Arabidopsis</i> : <i>Col-0 + 35S::GFP-CKX2<sup>I</sup>-mScarlet</i> | This paper               | N/A                                                                                                                       |
| <i>Arabidopsis</i> : <i>Col-0 + 35S::GFP-CKX2<sup>M</sup>-mScarlet</i> | This paper               | N/A                                                                                                                       |
| <i>Arabidopsis</i> : <i>Col-0 + pCKX2::CKX2<sup>M</sup>-mTurquoise</i> | This paper               | N/A                                                                                                                       |
| <i>Arabidopsis</i> : <i>crf2-1</i>                                     | (Šimášková et al., 2015) | <a href="#">SAIL 33 E04C1</a>                                                                                             |
| <i>Arabidopsis</i> : <i>crf2-2</i>                                     | (Šimášková et al., 2015) | <a href="#">SAIL 371 D04</a>                                                                                              |
| <i>Arabidopsis</i> : <i>crf3-1</i>                                     | (Šimášková et al., 2015) | <a href="#">SAIL 240 H09</a>                                                                                              |
| <i>Arabidopsis</i> : <i>crf3-2</i>                                     | (Šimášková et al., 2015) | <a href="#">SAIL 325 H03</a>                                                                                              |
| <i>Arabidopsis</i> : <i>RPS5a::CRF2</i>                                | (Šimášková et al., 2015) | N/A                                                                                                                       |
| <i>Arabidopsis</i> : <i>35S::CRF3</i>                                  | (Šimášková et al., 2015) | N/A                                                                                                                       |
| <i>Arabidopsis</i> : <i>pCRF2::GFP/GUS</i>                             | (Jeon et al., 2016)      | N/A                                                                                                                       |
| <i>Arabidopsis</i> : <i>pCRF3::GFP/GUS</i>                             | (Jeon et al., 2016)      | N/A                                                                                                                       |
| <i>Arabidopsis</i> : <i>pCYCB1::GUS</i>                                | (Ferreira et al., 1994)  | N/A                                                                                                                       |
| <i>Arabidopsis</i> : <i>pDR5::GFP</i>                                  | (Friml et al., 2003)     | N/A                                                                                                                       |

|                                                      |                                             |                                                                                                                                   |
|------------------------------------------------------|---------------------------------------------|-----------------------------------------------------------------------------------------------------------------------------------|
| <i>Arabidopsis</i> : pPIN3::PIN3-GFP                 | (Ioio et al., 2008; Zadnikova et al., 2010) | N/A                                                                                                                               |
| <i>Arabidopsis</i> : TCSn::GFP                       | (Liu and Müller, 2017)                      | N/A                                                                                                                               |
| <i>Arabidopsis</i> : TCSn::GFP <i>ahk2 ahk4</i>      | (Pernisova et al., 2018)                    | N/A                                                                                                                               |
| <i>Arabidopsis</i> : TCSn::GFP <i>ckx2-1</i>         | This paper                                  | N/A                                                                                                                               |
| <i>Arabidopsis</i> : pUBQ10::LUC2o                   | (Rellán-Álvarez et al., 2015)               | N/A                                                                                                                               |
| <i>Brassica napus</i> L.: Berny                      | Saatzucht Donau                             | N/A                                                                                                                               |
| <i>Brassica napus</i> L.: Harvey                     | Saatzucht Donau                             | N/A                                                                                                                               |
| <i>Brassica napus</i> L.: Jermey                     | Saatzucht Donau                             | N/A                                                                                                                               |
| <i>Brassica napus</i> L.: Randy                      | Saatzucht Donau                             | N/A                                                                                                                               |
| Oligonucleotides                                     |                                             |                                                                                                                                   |
| Primer listed in Table S2                            | Thermo Fisher Scientific                    | N/A                                                                                                                               |
| Recombinant DNA                                      |                                             |                                                                                                                                   |
| Plasmid: pGEX- <sup>SP</sup> CKX2 <sup>I</sup>       | This paper                                  | N/A                                                                                                                               |
| Plasmid: pGEX- <sup>SP</sup> CKX2 <sup>I</sup>       | This paper                                  | N/A                                                                                                                               |
| Plasmid: pGEX- <sup>SP</sup> CKX2 <sup>M</sup>       | This paper                                  | N/A                                                                                                                               |
| Plasmid: pGEX- <sup>SP</sup> CKX2 <sup>M</sup>       | This paper                                  | N/A                                                                                                                               |
| Plasmid: pPLV03-pCKX2::CKX2 <sup>I</sup> -mTurquoise | This paper                                  | N/A                                                                                                                               |
| Plasmid: pPLV03-pCKX2::CKX2 <sup>I</sup>             | This paper                                  | N/A                                                                                                                               |
| Plasmid: pPLV03-pCKX2::CKX2 <sup>M</sup>             | This paper                                  | N/A                                                                                                                               |
| Plasmid: pPLV03-35S::GFP-CKX2 <sup>I</sup> -mScarlet | This paper                                  | N/A                                                                                                                               |
| Plasmid: pPLV03-35S::GFP-CKX2 <sup>M</sup> -mScarlet | This paper                                  | N/A                                                                                                                               |
| Software and Algorithms                              |                                             |                                                                                                                                   |
| GWAS software                                        | (Seren et al., 2012)                        | <a href="http://www.gwas.gmi.oeaw.ac.at">www.gwas.gmi.oeaw.ac.at</a>                                                              |
| ImageJ/Fiji                                          | N/A                                         | <a href="https://fiji.sc/">https://fiji.sc/</a>                                                                                   |
| Image Studio Software                                | LI-COR                                      | <a href="https://www.licor.com/bio/products/software/image_studio/">https://www.licor.com/bio/products/software/image_studio/</a> |
| LAS AF Lite                                          | Leica                                       | N/A                                                                                                                               |
| L-Studio 4.0                                         | Karwowski, R.                               | N/A                                                                                                                               |
| Prism7                                               | GraphPad                                    | <a href="http://www.graphpad.com">www.graphpad.com</a>                                                                            |
| R package ggplot2                                    | (Wickham, 2016)                             | <a href="https://CRAN.R-project.org/package=ggplot2">https://CRAN.R-project.org/package=ggplot2</a>                               |
| Other                                                |                                             |                                                                                                                                   |
| Black Boxes                                          | Plastic-Mart                                | R121812A                                                                                                                          |

779

780 Plant material and growth conditions

781 Seeds of *Arabidopsis thaliana* accessions were kindly provided by Magnus Nordborg  
782 and Wolfgang Busch. A list of all lines used can be found in Supporting Information,  
783 Table S1. Seeds of *Brassica napus* L. were kindly provided by Saatzucht Donau.  
784 Seeds were surface sterilized, stratified at 4°C for 2 days in the dark. Seedlings were  
785 grown vertically on half Murashige and Skoog medium (1/2 MS salts (Duchefa), pH  
786 5.9, 1% sucrose, and 0.8% agar). Plants were grown under long-day (16 h light/8 h  
787 dark) conditions at 20–22°C.

788

## 789 Chemicals and Treatments

790 6-Benzylaminopurin (BAP) (Sigma), trans-Zeatin (tZ) (OChemim), N<sup>6</sup>-(2-  
791 Isopentenyl)Adenine (iP) (OChemim) were all dissolved in DMSO (Duchefa). 2-chloro-  
792 6-(3-methoxyphenyl)aminopurine (INCYDE) was synthesized in by the Laboratory of  
793 Growth Regulators, Palacký University & Institute of Experimental Botany AS CR  
794 (Olomouc, Czech Republic) as previously described (Zatloukal et al., 2008) and  
795 dissolved in DMSO. Treatments with BAP, tZ, iP and INCYDE were all performed on  
796 7 day old seedlings (transferred to supplemented media).

797 GUS stainings were performed after 24h and initial GSA measurements 7 days after  
798 transfer.

799

## 800 Genome-wide association studies (GWAS)

801 To identify the genetic basis of the for the GSA of LRs we carried out a GWAS using  
802 an accelerated mixed model (AMM) (Seren et al., 2012). The GWAS results can be  
803 viewed interactively online: <https://gwas.gmi.oeaw.ac.at/#/analysis/12722/overview>.

804

## 805 GLO-Roots

### 806 Rhizotrons

807 The basic rhizotron design was as described in (Rellán-Álvarez et al., 2015). To adapt  
808 the rhizotrons for use in an automated rhizotron handling system (designed by Modular  
809 Science, San Francisco), several modifications were implemented. The top edge of  
810 each rhizotron sheet was beveled using a belt sander to facilitate automated watering.  
811 Two 1/16" thin aluminium hooks used for automatic handling of the rhizotron were  
812 attached on each side of the rhizotron. To reduce light exposure of the root system  
813 during growth, a 1/8" thin black acrylic rhizotron top shield was installed.

814

### 815 Boxes and holders

816 Black 12" W x 18" L x 12" H boxes (Plastic-Mart) were used to grow plants in 12  
817 rhizotrons at a time. The arrangement of 1/8"-thin black acrylic sheets of different  
818 shapes and sizes formed 12 light-proof chambers to make sure that the roots of every  
819 rhizotron were shielded from light even when one rhizotron was removed for imaging.

### 820 Rhizotron preparation

821 Rhizotron preparation was as described in (Rellán-Álvarez et al., 2015) with slight  
822 modifications required by the new rhizotron design.

823

824 Plant growth in rhizotrons

825 Two transfer pipettes (each ~2ml) of quick-releasing fertilizer (Peter's 20-20-20) were  
826 added to each rhizotron after assembly. Assembled rhizotrons were placed into a box  
827 with water and allowed to absorb water overnight from the bottom side. Seeds  
828 containing the pUBQ10:LUC2o transgene were stratified for 2 days at 4°C in distilled  
829 water and 3 seeds were sown in the center of each rhizotron. Each rhizotron was  
830 equipped with a unique barcode. All rhizotrons were sprayed down with water and  
831 sealed with a transparent lid and packing tape. Plants were grown at 22/18°C  
832 (day/night) under long-day conditions (16h light, 8h dark) using LED lights (Vayola, C-  
833 Series, N12 spectrum) with a light intensity of about  $130 \mu\text{mol m}^{-2} \text{s}^{-1}$ . After 2 days, the  
834 transparent lid was unsealed, rhizotrons were watered with 2 transferring pipettes of  
835 water, and the lid left loose for an additional day. After removing the lid, rhizotrons were  
836 watered twice per day with 2 transferring pipettes of water each time until 9 days after  
837 sowing. Plant imaging:

838 20 days after sowing, the automated rhizotron handling system (designed by Modular  
839 Science, San Francisco) added 50ml of 300 $\mu\text{M}$  D-luciferin (Biosynth) at the top of each  
840 rhizotron and loaded the rhizotron into a fixed stage that was controlled by a Lambda  
841 10-3 optical filter changer (Sutter Instruments, Novato, CA) in the GLO1 imaging  
842 system (Rellán-Álvarez et al., 2015). 5-min exposures were taken per rhizotron side.  
843 A shoot image was taken right after the four root images using an ids UI-359xLE-C  
844 camera with a Fujinon C-Mount 8-80mm Varifocal lens that was installed in GLO1.  
845 Three LED strips on each side of the camera were switched on before a shoot image  
846 was taken.

847

848 Image preparation:

849 Image preparation was similar to in (Rellán-Álvarez et al., 2015): four individual root  
850 images were collected: top front, bottom front, top back, and bottom back. Using an  
851 automated ImageJ macro, a composite image was generated as follows: (1) images  
852 were rotated and translated to control for small misalignments between the two  
853 cameras; (2) the top and bottom images of each side were merged; (3) the back image  
854 was flipped horizontally; (4) the front and back images were combined using the

855 maximum values. The final images produced were 16-bit in depth and 4096 × 2048  
856 pixels. The scale of the images was 138.6 pixels per cm.

857

#### 858 Hypoxia Treatment

859 All following treatments were performed in air-tight glass desiccators in which  
860 seedlings grown on vertical agar plates were carefully placed with the lids removed.  
861 Seedlings were exposed to a hypoxia treatment by flushing the desiccators with  
862 humidified 100% N<sub>2</sub> gas (2l/min) for 4 hours (13.00-17.00h) in the dark to limit  
863 photosynthesis derived oxygen production. For the controls, desiccators were flushed  
864 with humidified air. Flow rates were controlled by mass flow controllers (MASS-VIEW,  
865 Bronkhorst). At the end of the hypoxia treatment, plates were carefully removed from  
866 the desiccators, closed, and transferred back to the climate chamber. The plates  
867 remained in the climate chambers under control growth conditions for 5 days after the  
868 treatment after which they were scanned using an EPSON Scanner V300.

869

#### 870 DNA constructs

871 The promoter region and full-length CKX2<sup>1</sup> or coding DNA sequence (CDS) were  
872 amplified by PCR (Table S2) from genomic DNA or cDNA using Q5 High-Fidelity DNA  
873 Polymerase (NEB) and cloned either alone or under of the 35S promoter together with  
874 GFP and mScarlet-i into pPLV03 or pGEX5x3 using Gibson Assembly (NEB).  
875 Subsequently, this plasmid were used for *in vitro* mutagenesis (Table S2) to obtain  
876 CKX2<sup>M</sup>. The resulting constructs were transformed into Col-0 and *ckx2-1* plants using  
877 the floral dipping method (Clough and Bent, 1998) or for transient transformation in  
878 tobacco plants.

879

#### 880 Expression, Purification and Activity Measurement of Recombinant Proteins

881 Recombinant proteins were expressed as GST fusion proteins and in *Escherichia coli*  
882 BL21 codon plus strain. Proteins were purified using the Sepharose beads affinity  
883 method (Glutathione Sepharose 4B; GE Healthcare).

884 The activity was measured using a modified end-point method previously described  
885 (Frébort et al., 2002). For activity screening, the samples were incubated in a reaction  
886 mixture (total volume of 600 µl) that consisted of 200 mM Mcllvaine buffer (100 mM  
887 citric acid and 200 mM Na<sub>2</sub>HPO<sub>4</sub>) pH 7.4, 500 µM 2,6-dichlorophenol indophenol  
888 (DCPIP; Sigma) as electron acceptor and different concentrations of N<sup>6</sup>-(2-

889 isopentenyl)adenine (iP; Sigma) as substrate. The volume of the enzyme sample used  
890 for the assay was adjusted based on the enzyme activity. The incubation time at 37 °C  
891 was 1h. The enzymatic reaction was stopped after incubation by adding 300 µl of 40%  
892 trichloroacetic acid (TCA), then 200 µl 2% 4-aminophenol (Sigma) (in 6% TCA) was  
893 added and the sample was centrifuged at 13,200 rpm for 5 min to remove protein  
894 precipitate. 200 µl supernatant was used to measure the absorption spectrum from  
895 352 nm to 500 nm to determine the concentration of produced Schiff base with  
896  $\epsilon_{352}=15.2 \text{ mM}^{-1}\text{cm}^{-1}$  using a plate reader.

897

### 898 Microscopy

899 Confocal microscopy was performed using a Leica SP5 (Leica). Fluorescence signals  
900 for GFP (excitation 488 nm, emission peak 509 nm), mScarlet-i (excitation 561 nm,  
901 emission peak 607 nm) and propidium iodide (PI) staining (excitation 569 nm, emission  
902 peak 593 nm) were detected with a 40x or 63x (water immersion) objective. Image  
903 processing was performed using LAS AF lite software (Leica). Graphpad Prism  
904 software was used to evaluate the statistical significance of the differences observed  
905 between control and treated groups (One-way ANOVA).

906

### 907 Gravitropic Set-Point Angle Measurements

908 Plates with 14-day-old seedlings were scanned and the initial gravitropic set-point  
909 angle (iGSA) of individual LR<sub>s</sub> was measured with reference to the gravity vector  
910 (Rosquete et al., 2013) using Image J software. Individual GSA values were then  
911 sorted into 8 categories: 0°-30°, 31°-50°, 51°-70°, 71°-90°, 91°-110°, 111°-180°.  
912 Percentages of incidence were calculated for each category and graphs of GSA  
913 distribution were generated. The test of Kolmogorov-Smirnov (KS-test) was used  
914 online ([http://www.physics.csbsju.edu/stats/KS-test.n.plot\\_form.html](http://www.physics.csbsju.edu/stats/KS-test.n.plot_form.html)) to statistically  
915 evaluate the GSA data sets generated from mutants and treated seedlings in  
916 comparison to wild type and untreated controls, respectively.

917

### 918 Histochemical GUS Staining

919 GUS histochemical staining of acetone-fixed 7-day-old seedlings containing  
920 pCycB1::GUS fusion constructs followed a previously described method (Crone et al.,  
921 2001) using x-Gluc (Carl Roth) as substrate. Examination of stained seedlings and  
922 image acquisition were performed with a light microscope (Zeiss Observer D1)

923 equipped with a DFC 300 FX camera (Zeiss). Graphpad Prism software was used to  
924 evaluate the statistical significance of the differences observed between control and  
925 treated groups (One-way ANOVA).

926

#### 927 Transient Transformation, Protein Extraction and Immunoblot Analysis

928 The *Agrobacterium tumefaciens* strain GV3101 was transformed with the respective  
929 construct and grown for 2 d at 28°C in 5 ml Luria-Bertani (LB). The preculture was  
930 used to inoculate 25 ml LB and incubated for 4 h at 28°C. Cells were pelleted and  
931 resuspended in 30 ml LB supplemented with 100 µM acetosyringone. After 2 h, cells  
932 were resuspended in 30 ml of 5% sucrose and infiltrated in tobacco (*Nicotiana*  
933 *tabacum*) leaves. Subcellular localization was examined 3 d after transformation by  
934 confocal laser scanning microscopy (see above) or leaves were ground to fine powder  
935 in liquid nitrogen and solubilized with extraction buffer (25 mM TRIS, pH 7.5, 10 mM  
936 MgCl<sub>2</sub>, 15 mM EGTA, 75 mM NaCl, 1 mM DTT, 0.1% Tween20, with freshly added  
937 proteinase inhibitor cocktail (Roche)). Protein concentration was assessed using the  
938 Bradford method. Membranes were probed with a 1:1,000 dilution of GFP antibody  
939 (abcam) or 1:20,000 of tubulin antibody (Sigma). Goat IRDye 800CW anti-mouse (LI-  
940 COR) or goat IRDye 800 CW anti-rabbit (LI-COR) was used (1:20,000) as secondary.  
941 The signals were detected and quantified using the Odyssey Imagine System (LI-  
942 COR).

943

#### 944 RNA Extraction, cDNA Synthesis and Quantitative PCR

945 RNA extraction was describe previously (Hofmann et al., 2019). In brief: A pool of  
946 10 lateral roots or root tips were collected in 30 µl of 100% RNAlater (Thermo Fisher)  
947 and 500 µl of TRIzol (Sigma) was added followed by brief vortexing (2 × for 2 s each)  
948 and incubating at 60°C for 30 min. 100 µl of chloroform was added, and then, samples  
949 were vortexed briefly (2 × for two seconds each) and incubated at room temperature  
950 for three minutes. After centrifugation at 12,000g for 15 min at 4°C, the aqueous phase  
951 was transferred to a new LoBind tube. To precipitate the RNA, an equal volume of  
952 isopropanol and 1.5 µl of GlycoBlue (Thermo Fisher) was added followed by a – 20°C  
953 incubation for 15–18 h and centrifugation at > 20,000 g for 30 min at 4°C. After removal  
954 of the supernatant, the pellet was washed by adding 500 µl of 75% ethanol, vortexing  
955 briefly and then centrifuged at > 20,000 g for 15 min at 4°C. The 75% ethanol wash  
956 step was repeated 1 ×. As much ethanol as possible was removed followed by the

957 drying of the pellet by letting the Eppendorf tube sit on ice with lid open for 10 min.  
958 Precipitated RNA was then resuspended with 5–12  $\mu$ l of nuclease-free water, stored  
959 at  $-80^{\circ}\text{C}$ . cDNA synthesis was performed using SuperScript II (Thermo Fisher) and  
960 qPCR using 2x Takyon for SYBR Assay – no ROX (Eurogentec) following the  
961 manufactures instructions on a CFX96 Touch Real-Time PCR Detection System (Bio-  
962 Rad). Expression values were normalized to the expression of ubiquitin 5 (UBQ5) and  
963 translation initiation factor EIF4A.

964

#### 965 Cytokinin Measurements

966 Quantification of cytokinin metabolites was performed according to the method  
967 described by (Svačinová et al., 2012), including modifications described in (Antoniadi  
968 et al., 2015). Briefly, samples (20 mg FW) were extracted in 1 ml of modified Bielecki  
969 buffer (Hoyerová et al., 2006) together with a cocktail of stable isotope-labeled internal  
970 standards used as a reference (0.25 pmol of CK bases, ribosides, N-glucosides, and  
971 0.5 pmol of CK O-glucosides, nucleotides per sample added). The extracts were  
972 purified using the Oasis MCX column (30 mg/1 ml, Waters) and cytokinin levels were  
973 determined using the LC-MS/MS system consisting of an ACQUITY UPLC System and  
974 a Xevo TQ-S triple quadrupole mass spectrometer (Waters). Results are presented as  
975 the average of five biological replicates  $\pm$  standard deviation in pmol/g FW. Statistical  
976 examinations were made between Col-0 wild type and *ckx2-1* roots using two-way  
977 ANOVA analysis.

978

#### 979 Description of the computer model of LR

980 For the sake of simplicity, our model is composed of a rectangular grid in which each  
981 box represents a single cell. Cell walls are modelled as a linear elastic spring  
982 (connecting 2 adjacent vertices) that can expand and contract in order to minimize  
983 forces acting on each spring. The magnitude of force exerted by this spring is  
984  $k_x \cdot (L_{u,v} - |p_u - p_v|)$  and is positive for spring compression. The  $k_x$  characterizes the  
985 stiffness of the spring and was set to 0.9 in all simulations. This force is in the direction  
986 of the spring  $\frac{p_u - p_v}{|p_u - p_v|}$ .  $p_u$  is the position of vertex  $u$ , and  $p_v$  is the position of neighbor  
987 vertex  $v$ . The total force exerted on vertex  $u$  located at position  $p_u$  by all such springs  
988 can be written as:



$$989 \quad F_{linear}^u = \sum_{v \in N_u} k_x \cdot (L_{u,v} - |p_u - p_v|) \cdot \frac{p_u - p_v}{|p_u - p_v|}$$

990 where  $N_u$  is the set of vertices adjacent to vertex  $u$ . The norm symbol indicates the  
 991 Euclidean distance between the points.

992 In addition to the forces acting on a vertex due to springs, a force due to the turgor  
 993 pressure inside the cell ( $p_{const} = 0.005$ ) acts in the direction normal to each wall ( $\mathbf{n}$ ):

$$994 \quad F_{pressure}^u = p_{const} \cdot \hat{\mathbf{n}} \cdot |p_u - p_v|$$

995 Combining the individual force components, the total force acting on a vertex  $u$  is the  
 996 sum of forces acting on each cell wall and internal pressure inside the cells.

997 In accordance with Newton's Second Law of motion we calculated the velocity ( $Vel_u$ )  
 998 and position ( $p_u$ ) of vertex  $u$  over time for point mass  $m_u = 1$  with the following formulas:

$$999 \quad \frac{dVel_u}{dt} = \frac{F_{total}^u}{m_u} - \beta \cdot Vel_u, \quad \frac{dp_u}{dt} = Vel_u$$

1000 where  $\beta=0.2$  is a damping constant.

1001 The LR root model is spatially divided into two zones (root tip and elongation zones)  
 1002 (Figure S9) along the x-axis based on the threshold parameter that defines distance  
 1003 between individual cell centers and right-most cell centers. This parameter controls the  
 1004 length of the elongation zone or simply the number of elongating cells in our  
 1005 simulations (Figure S8C-D). Along the y-axis, cells elongate at different rates based  
 1006 on the smooth polynomial interpolation between the minimum measured elongation  
 1007 rate at the bottom part of the LR (5  $\mu\text{m/h}$ ) to the maximum elongation rate at the top  
 1008 part of the LR (15  $\mu\text{m/h}$ ) (Rosquete et al., 2013). Cell elongation is simulated by  
 1009 expanding the resting length of linear springs.

$$1010 \quad \frac{dL_{u,v}}{dt} = L_{u,v} \cdot r(d)$$

1011 Where  $r(d)$  is an interpolated growth rate and  $d$  is the relative distance from the bottom  
 1012 part of the LR such that  $r_{min}(0) = 5 \mu\text{m/h}$  and  $r_{max}(1) = 15 \mu\text{m/h}$ .

1013 The geometry of the model was created using a version of the VV simulator (Smith et  
1014 al., 2003; 2006) embedded in the modeling software L-studio (Karwowski  
1015 (<http://algorithmicbotany.org/lstudio>)). Cell mechanics (mass-spring system) was  
1016 simulated using the forward Euler method. All simulations were stopped after 8 hours  
1017 of elapsed growth as observed experimentally. Screenshots from model simulations  
1018 are shown in Figure S9A.

1019

## 1020 **Supplemental Information**

1021

1022 **Table S1. Accessions with their mean GSA distribution (compared to Col-0) used**  
1023 **in this study.**

1024

1025 **Table S2. Oligonucleotides used in this study.**

1026

1027 **Figure S1. Representative root system images of selected accessions.**

1028 (A) 10-day old accessions grown in 3D agar cylinders. n = 5 cylinders. Scale bars, 1  
1029 cm.

1030 (B) 20-day old accessions grown in soil. n = 5-10 plants. Scale bars, 5 cm.

1031 (A)-(B) Representative images are shown. Experiments were repeated at least three  
1032 times.

1033

1034 **Figure S2. Calculation of linkage disequilibrium by pairwise comparison of 500**  
1035 **SNPs.**

1036  $r^2$  value is scaled and color-coded (blue to red) from 0 to 1 (low to high association).

1037 Underlying code can be found at github

1038 <https://github.com/timeu/PyGWAS/blob/master/pygwas/core/genotype.py#L59>).

1039

1040 **Figure S3. Influence of cytokinin on GSA of lateral roots.**

1041 (A)-(E) Quantification of different CK forms (nucleotides (precursors), ribosides  
1042 (transported forms), free bases (active forms), and O-/N-glucosides  
1043 (reversible/irreversible inactivated storage forms) in Col-0 wild type and *ckx2-1* mutant  
1044 roots. (A) iP-Types, (B) Total CKs, (C) cZ-Types, (D) DHZ-Types, (E) tZ-Types.

1045 (F)-(G), GSA distributions of DMSO and (F) trans-zeatin (tZ)-treated or (G)  
1046 isopentenyladenine (iP)-treated Col-0 wild type seedlings.

1047 (H) Representative images and GSA distributions of four different untreated and BA-  
1048 treated winter oilseed rape (*Brassica napus* L.) genotypes.

1049 (A)-(E) One-way ANOVA analysis P-values: \*  $P < 0.05$ , \*\*  $P < 0.01$ , \*\*\*  $P < 0.001$ .  
1050 Mean  $\pm$  SD,  $n = 5$  extractions.

1051 (F)-(H) Kolmogorov-Smirnov test P-values: \*  $P < 0.05$ , \*\*  $P < 0.01$ , \*\*\*  $P > 0.001$   
1052 (compared to DMSO or Col-0, respectively). Mean  $\pm$  SEM, for *A. thaliana*:  $n = 5$  plates  
1053 (16 seedlings with 100-160 LRs per plate), for oilseed rape:  $n = 3$  seedlings with 25-50  
1054 LRs per seedling). Experiments were repeated at least three times.

1055

1056 **Figure S4. Role of type-A Arabidopsis response regulators (ARRs) and cytokinin**  
1057 **response factors (CRFs) in the GSA establishment in LRs.**

1058 (A) Expression of *ARRs* in various root tissues. Data from Brady et al., 2007.

1059 (B) Expression of *CRFs* in various root tissues. Data from Brady et al., 2007.

1060 (C) GUS staining of pARR3::GUS and pARR4::GUS. Scale bars, 25  $\mu$ M.

1061 (D) GSA distribution of Col-0 wild-type, *arr3* and *arr4* mutants. Kolmogorov-Smirnov  
1062 test. Mean  $\pm$  SEM,  $n = 5$  plates (16 seedlings with 100-160 LRs per plate).

1063 (E) Representative images after GUS staining of pCRF2::GFP-GUS and pCRF3::GFP-  
1064 GUS in stage I-III LR. Scale bars, 10  $\mu$ m.

1065 (F) Representative images of pCRF2::GFP-GUS and pCRF3::GFP-GUS in the main  
1066 root tip. Scale bars, 25  $\mu$ m.

1067 (G) GSA distribution of Col-0 wild type and (A) *crf* single mutants. Kolmogorov-Smirnov  
1068 test P-values: \*\*\*  $P < 0.001$  (compared to Col-0). Mean  $\pm$  SEM,  $n = 5$  plates (16  
1069 seedlings with 100-160 LRs per plate).

1070 (C)-(G) Experiments were repeated three times.

1071

1072 **Figure S5. Snow cover in Sweden and characterization of CKX2<sup>I</sup> and CKX2<sup>M</sup>.**

1073 (A) Average number of days with snow cover in Sweden between 1961-1990. Source:  
1074 <https://bit.ly/2UmLAeT>

1075 (B) Localization of GFP-<sup>SP</sup>CKX2<sup>I</sup>-mScarlet and GFP-<sup>SP</sup>CKX2<sup>M</sup>-mScarlet. Tobacco  
1076 leaves were infiltrated with *Agrobacterium tumefaciens* containing constructs and the  
1077 expression of CKX2 fluorescent protein was visualized by confocal laser scanning  
1078 microscopy three days after infiltration. Scale bar, 25  $\mu$ m. Representative images are  
1079 shown.

1080 (C) GSA distributions of Col-0 and *ckx2-1* as well as CKX2<sup>I</sup> and CKX2<sup>M</sup> expressing  
1081 lines in both backgrounds. Kolmogorov-Smirnov test P-value: \*\*\* P < 0.001 (compared  
1082 to Col-0). Mean ± SEM, n = 5 plates (16 seedlings with 100-160 LRs per plate).  
1083 (B)-(C) Experiments were repeated at least three times.

1084

1085 **Figure S6. Localization of CKX2 in the main root tip and characterization of**  
1086 **cytokinin responses in *ckx2-1* mutants.**

1087 (A) Representative images of pCKX2::CKX2-mTurquoise in the main root. Propidium  
1088 iodide (PI) was used for counterstaining. Scale bar, 25 µm.

1089 (B)-(C) Signal quantification of (B) PIN3::PIN3-GFP and (C) DR5::GFP in stage II LR.

1090 (D)-(E) Representative images and quantifications of (A) TCSn::GFP in Col-0 wild type  
1091 and *ckx2-1*, (B) TCSn::GFP in Col-0 wild type and *ahk2 ahk4* in stage I – III LR. Scale  
1092 bar, 10 µm.

1093 (F) Signal quantification of TCSn::GFP in the main root after gravity stimulation.

1094 (G) Signal quantification of DR5::GFP in the main root after gravity stimulation (positive  
1095 control for (F)).

1096 (H) Representative images and quantifications of TCSn::GFP in Col-0 wild type after  
1097 treatment with DMSO or 1 µM NPA for 24h in stage I – III LR. Scale bar, 10 µm.

1098 (D)-(H) One-way ANOVA P-values: \* P < 0.05, \*\* P < 0.01, \*\*\* P < 0.001. Horizontal  
1099 lines show the medians; box limits indicate the 25th and 75th percentiles; whiskers  
1100 extend to the min and max values. n = 10-15 individual LR or main roots.

1101 (A)-(H) Experiments were repeated at least three times.

1102

1103 **Figure S7. Cytokinin-dependent interference with cell division rates defines**  
1104 **angular growth of lateral roots.**

1105 (A) Computer simulations displaying that the number of elongating cells impacts on  
1106 GSA angle in the proportional manner.

1107 (B) Time evolution of set-point angle corresponding to (A).

1108 (C) Decreasing number of elongating cells on the upper half part of the LR elongation  
1109 zone. Note the gradual increase of set-point angle with decreasing number of  
1110 elongating cells.

1111 (D) Time evolution of set-point angle corresponding to (C). Colour of curves matches  
1112 simulation with the colour bar shown in (A) and (C). Simulations represent LR status  
1113 after 8h of dynamic elongation.

1114 (E)-(F) Quantification of (E) first two elongated cells of stage II lateral roots and (F)  
1115 lateral root meristem after treatment with DMSO or 200 nM BAP for 24h.  
1116 (G)-(H) Quantification of CycB1;1::GUS after treatment with (G) DMSO or 200 nM BAP  
1117 or (H) DMSO or 50 nM INCYDE for 24h.  
1118 (E)-(H) One-way ANOVA P-values: \* P < 0.05, \*\*\* P < 0.001. Horizontal lines show the  
1119 medians; box limits indicate the 25th and 75th percentiles; whiskers extend to the min  
1120 and max values. n = 10-15 individual LRs.  
1121 (I) Kinetics of gravitropic response of dark grown Col-0, *cdkb1;1 ckd1;2* and CDKB1;1  
1122 DN. Mean ± SD, n = 10-15 individual roots.  
1123 (J) Schematic model depicts spatially defined gravitropic and anti-gravitropic hormonal  
1124 cues at opposing organ flanks. Cytokinin signalling functions as an anti-gravitropic  
1125 growth regulator at the upper side and thereby counterbalances auxin-dependent  
1126 gravitropic growth of lateral roots.  
1127 (A)-(I) Experiments were repeated at least three times.

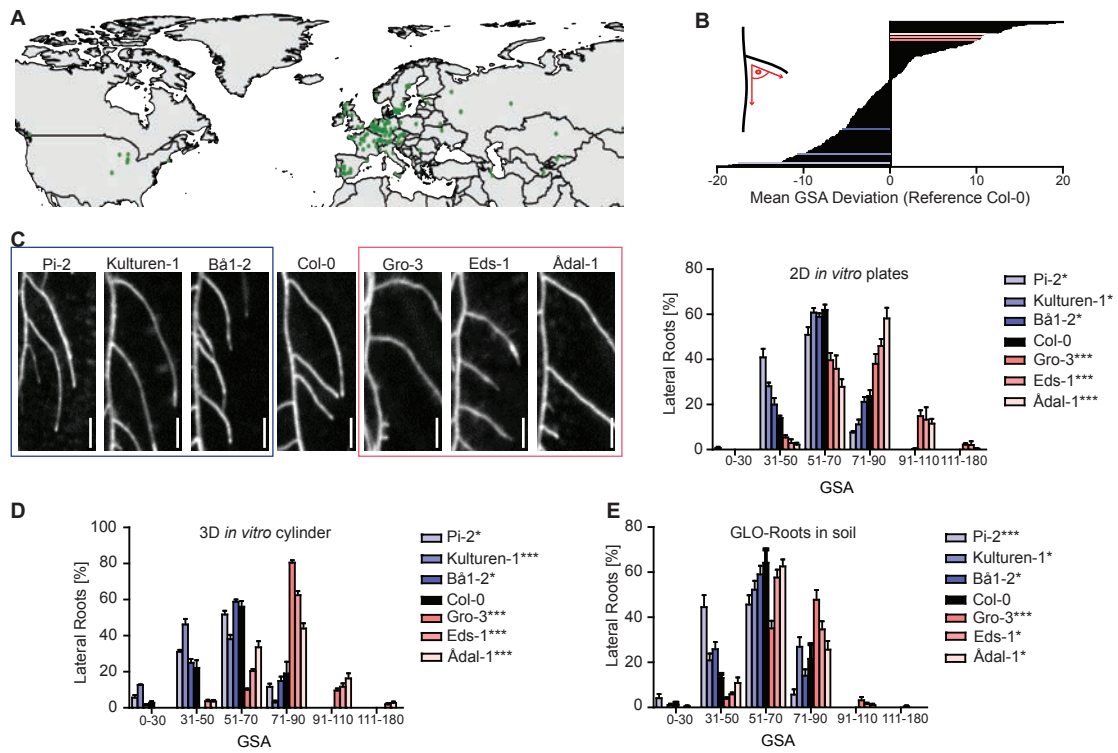

**Figure 1. Natural variation of the primary GSA of lateral roots in *Arabidopsis thaliana*.**

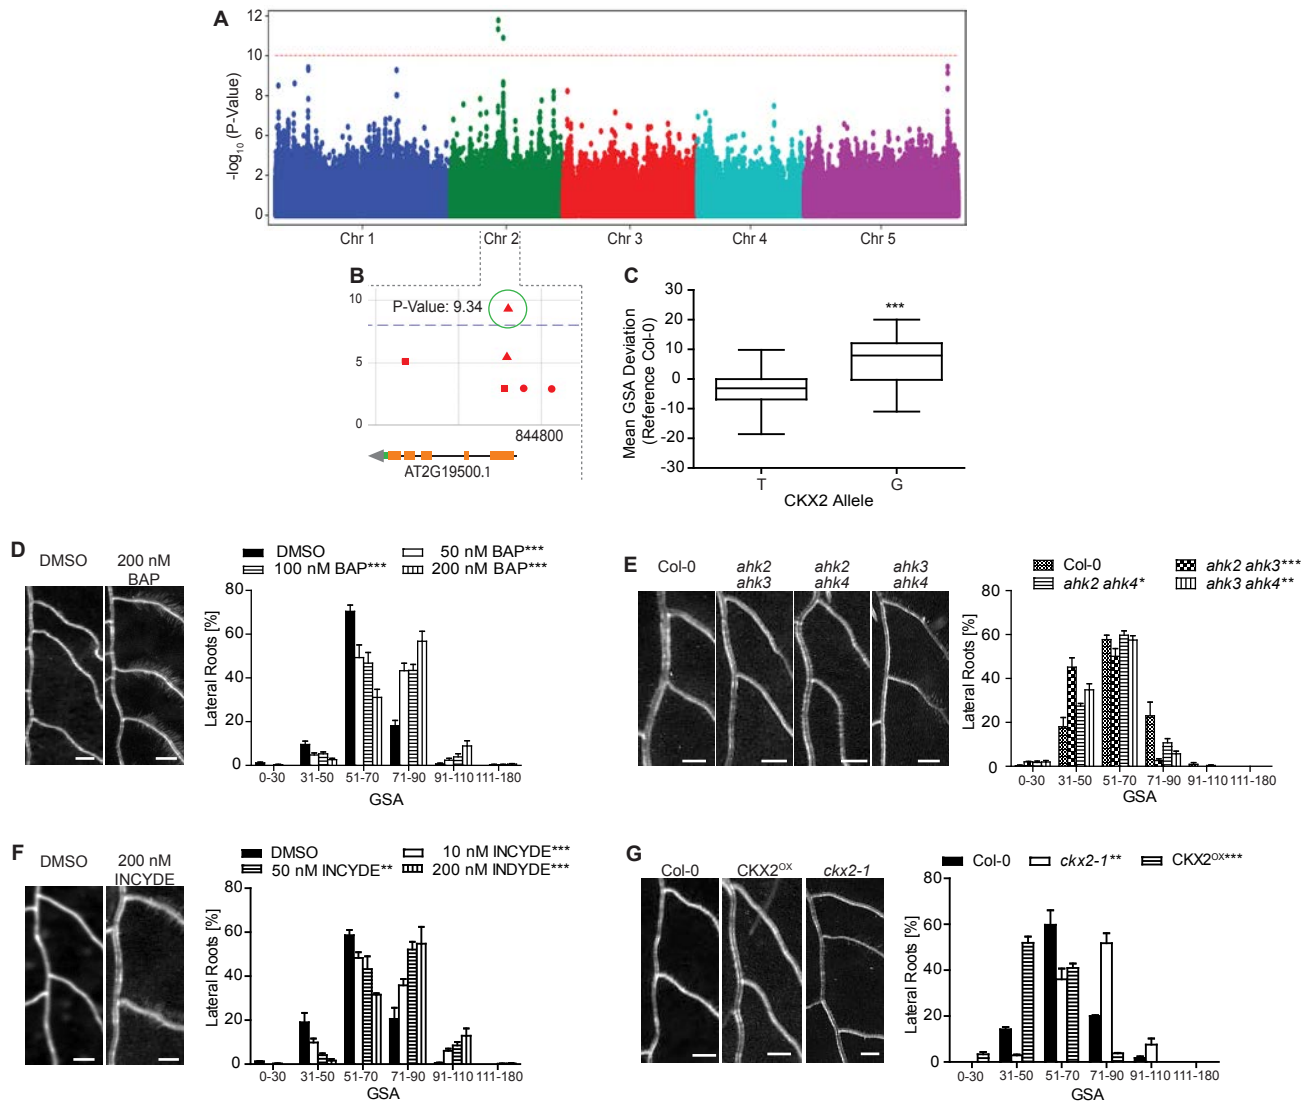

**Figure 2. Genome-wide association study (GWAS) on gravitropic set point angle (GSA).**

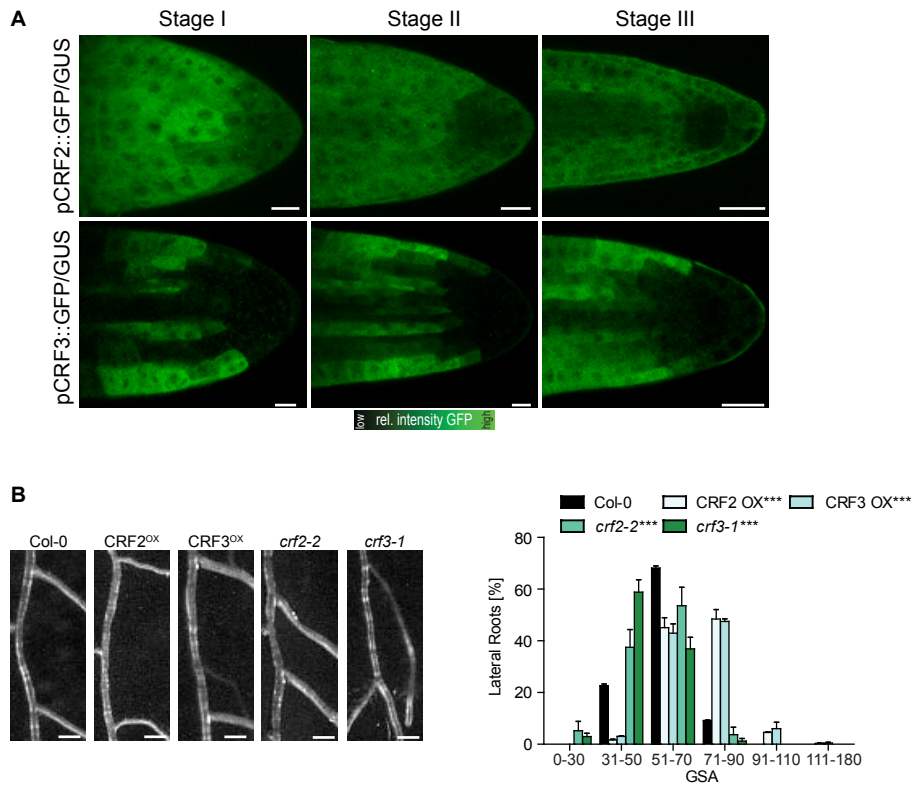

**Figure 3. Characterization of Cytokinin Response Factors (CRFs) in lateral roots.**



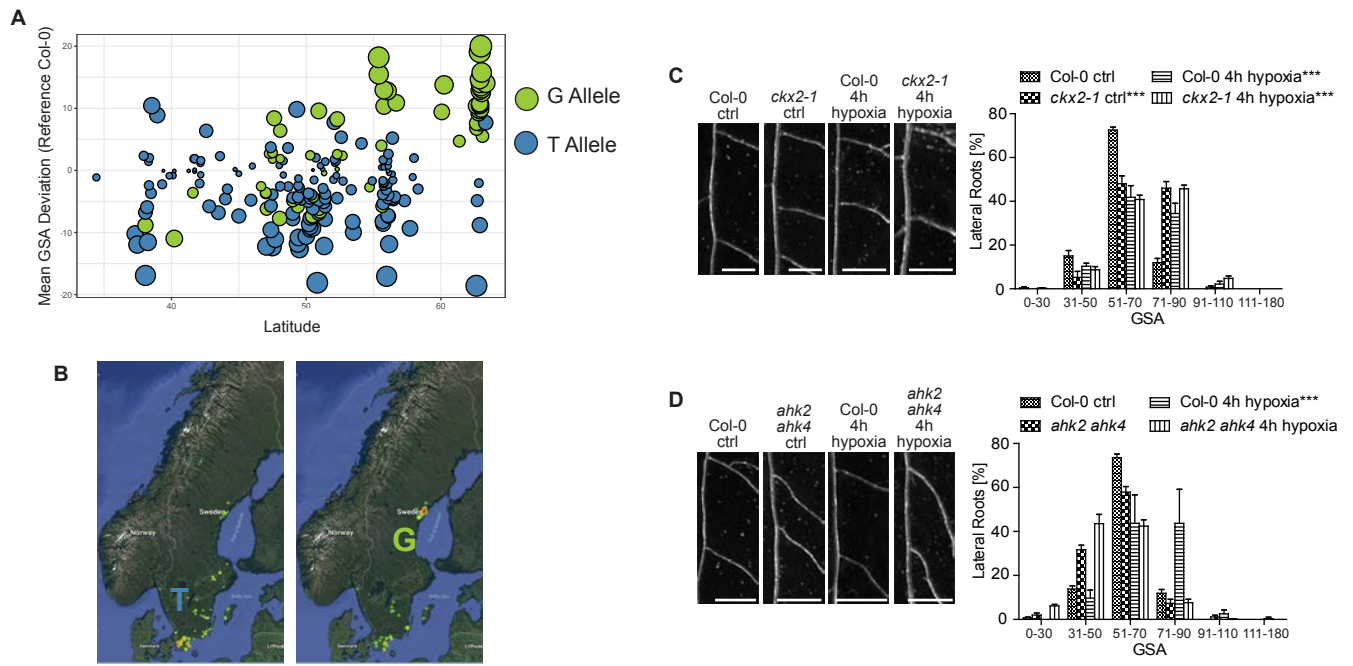

**Figure 4. Cytokinin signalling integrates environmental signals into angular lateral root growth.**

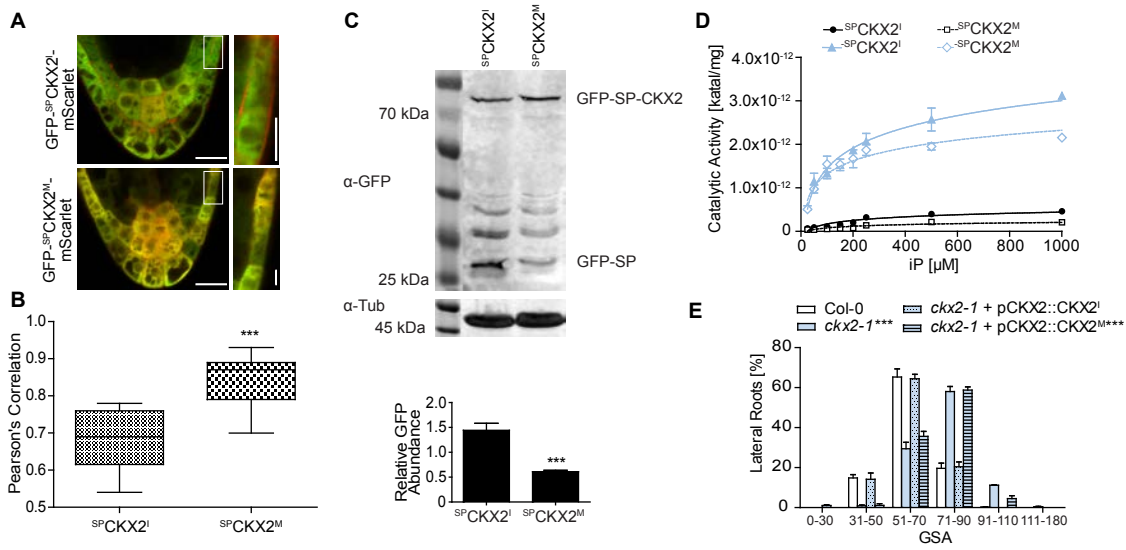

**Figure 5. Signal Peptide processing is required for CKX2 activity.**

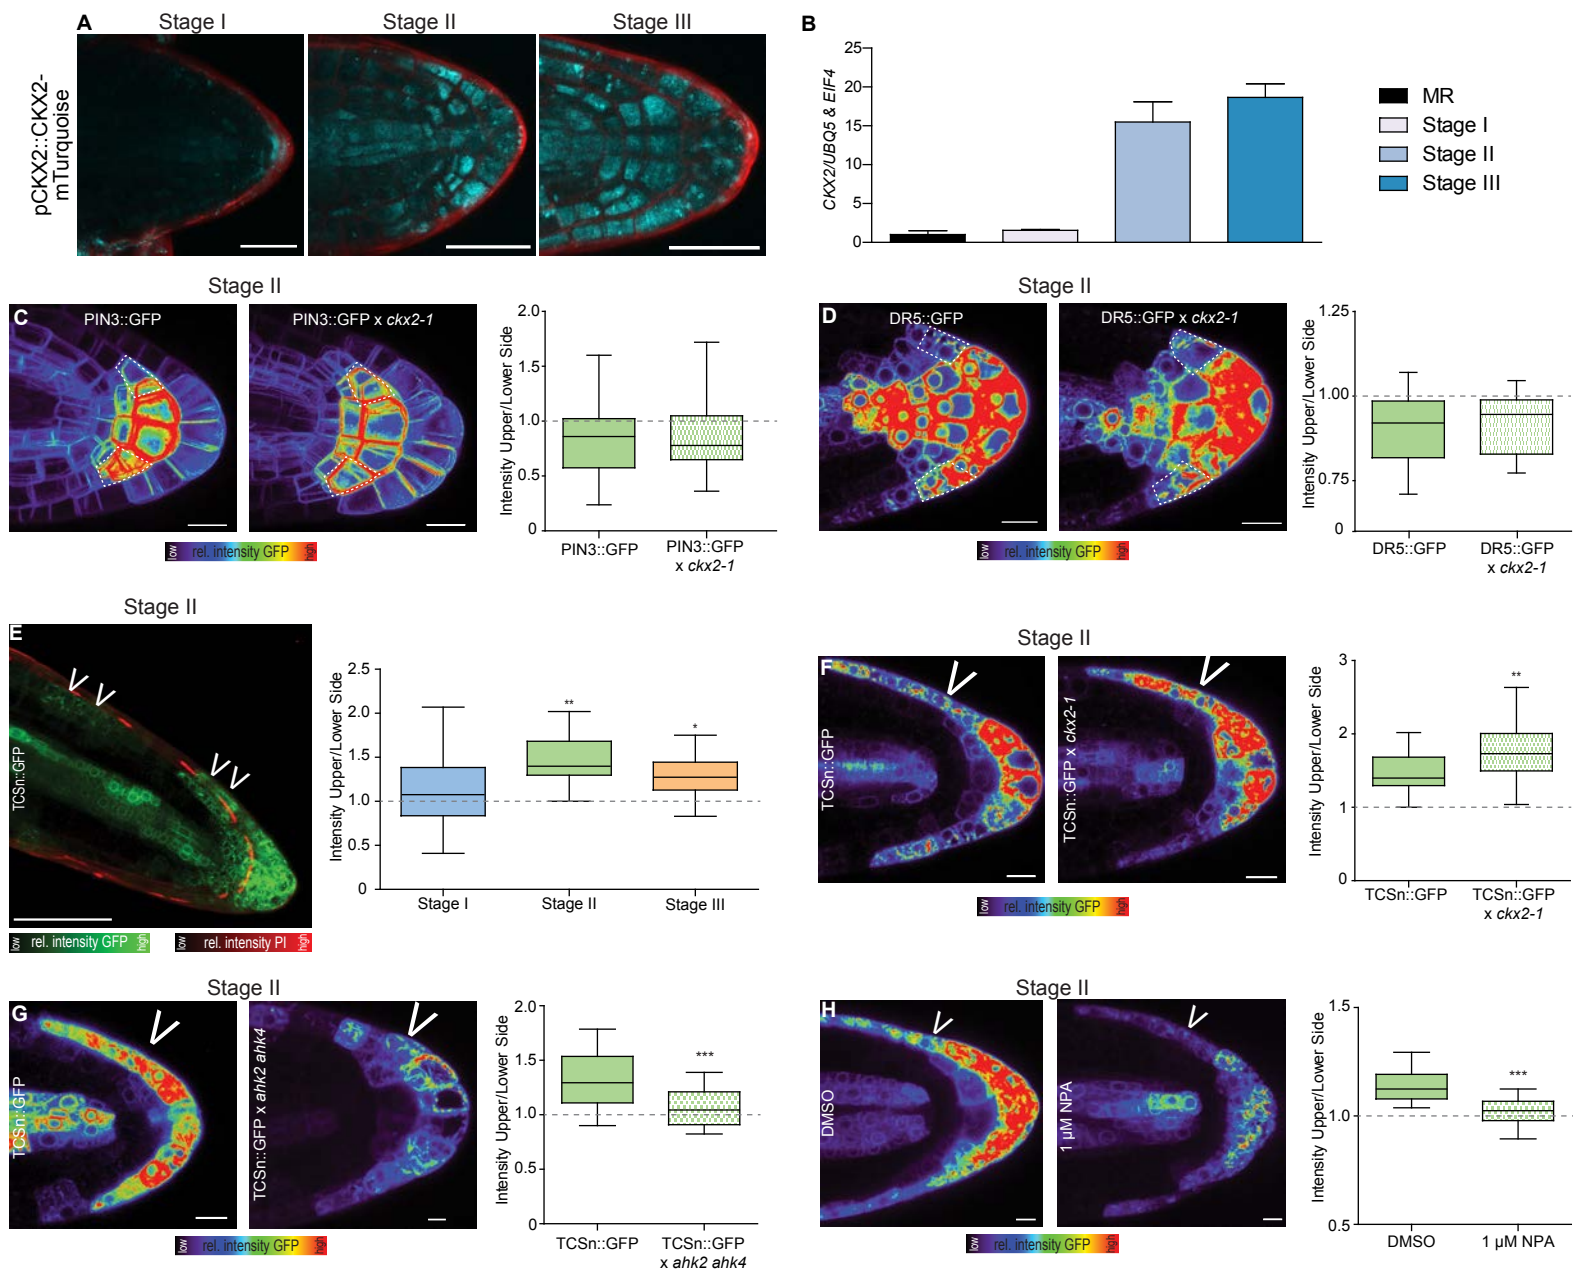

**Figure 6. CKX2 modulates asymmetric cytokinin signalling in emerged lateral roots.**

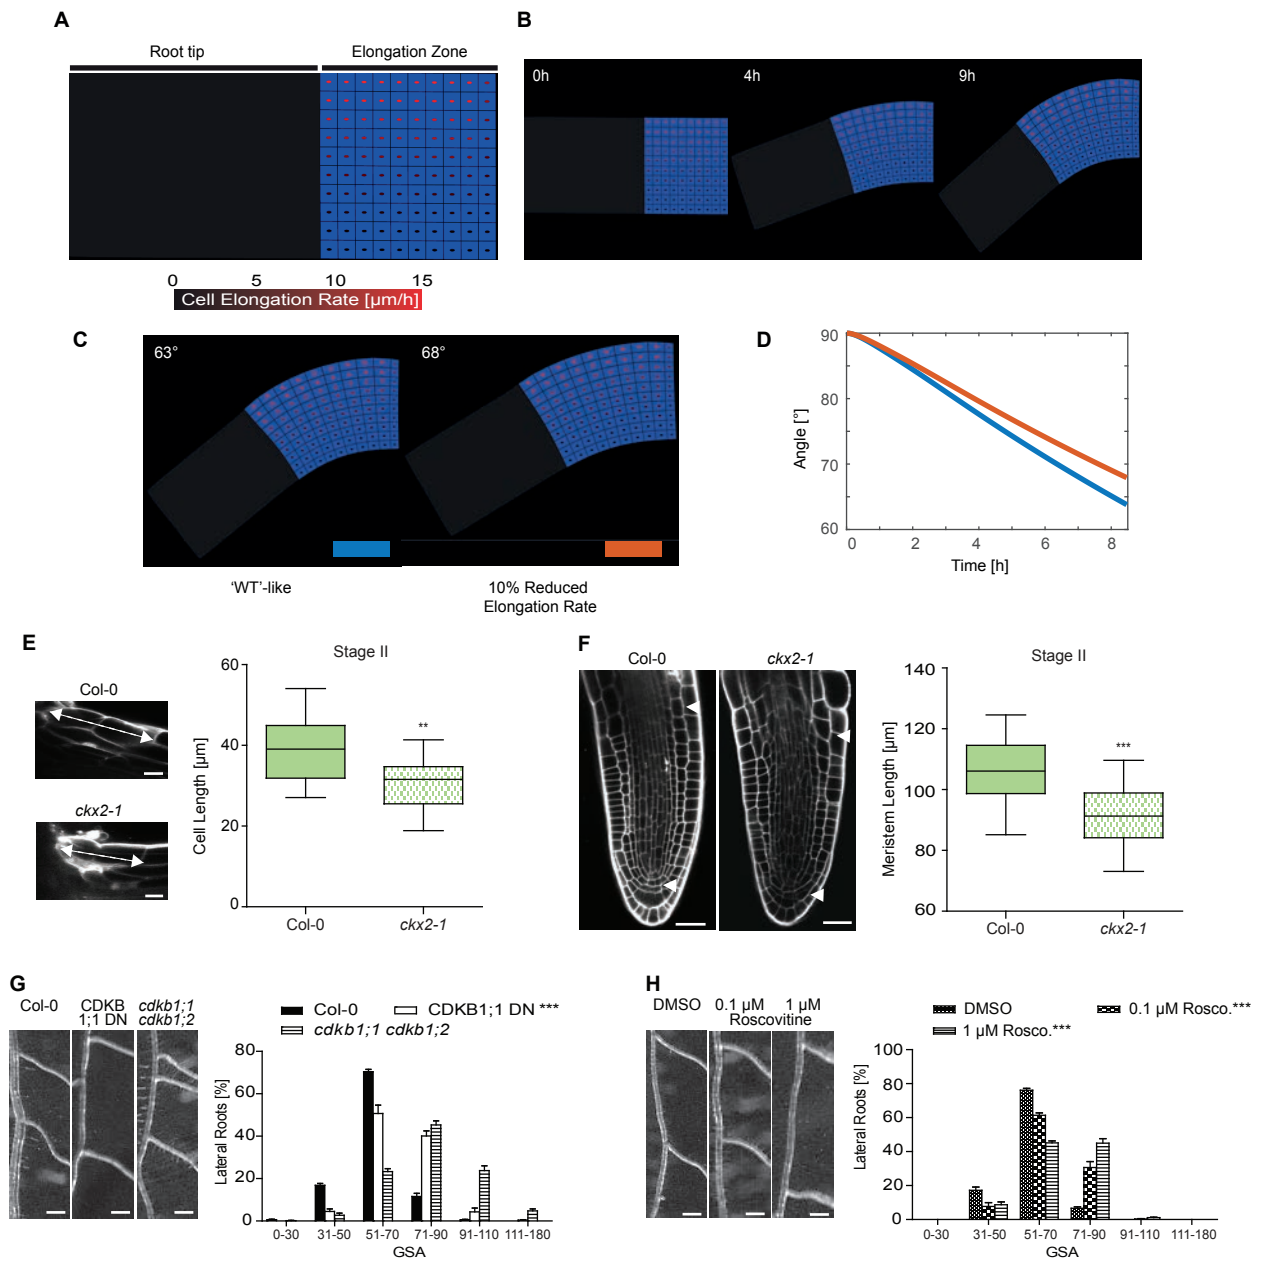

**Figure 7. Cytokinin-dependent interference with cell cycle defines angular growth of lateral roots.**

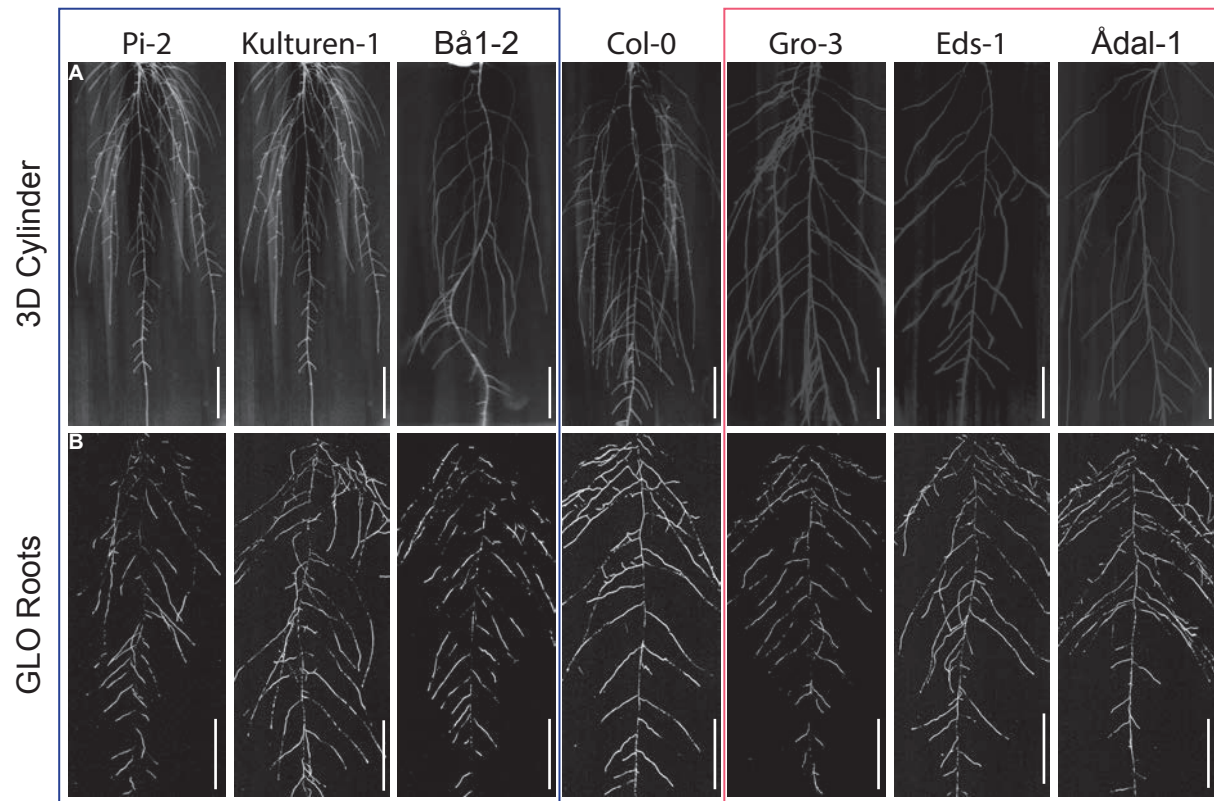

**Figure S1. Representative root system images of selected accessions.**

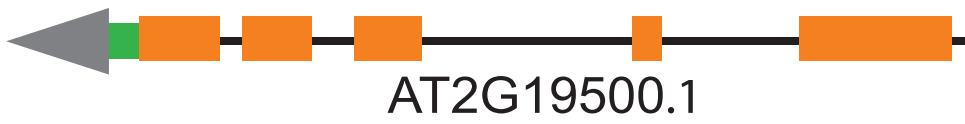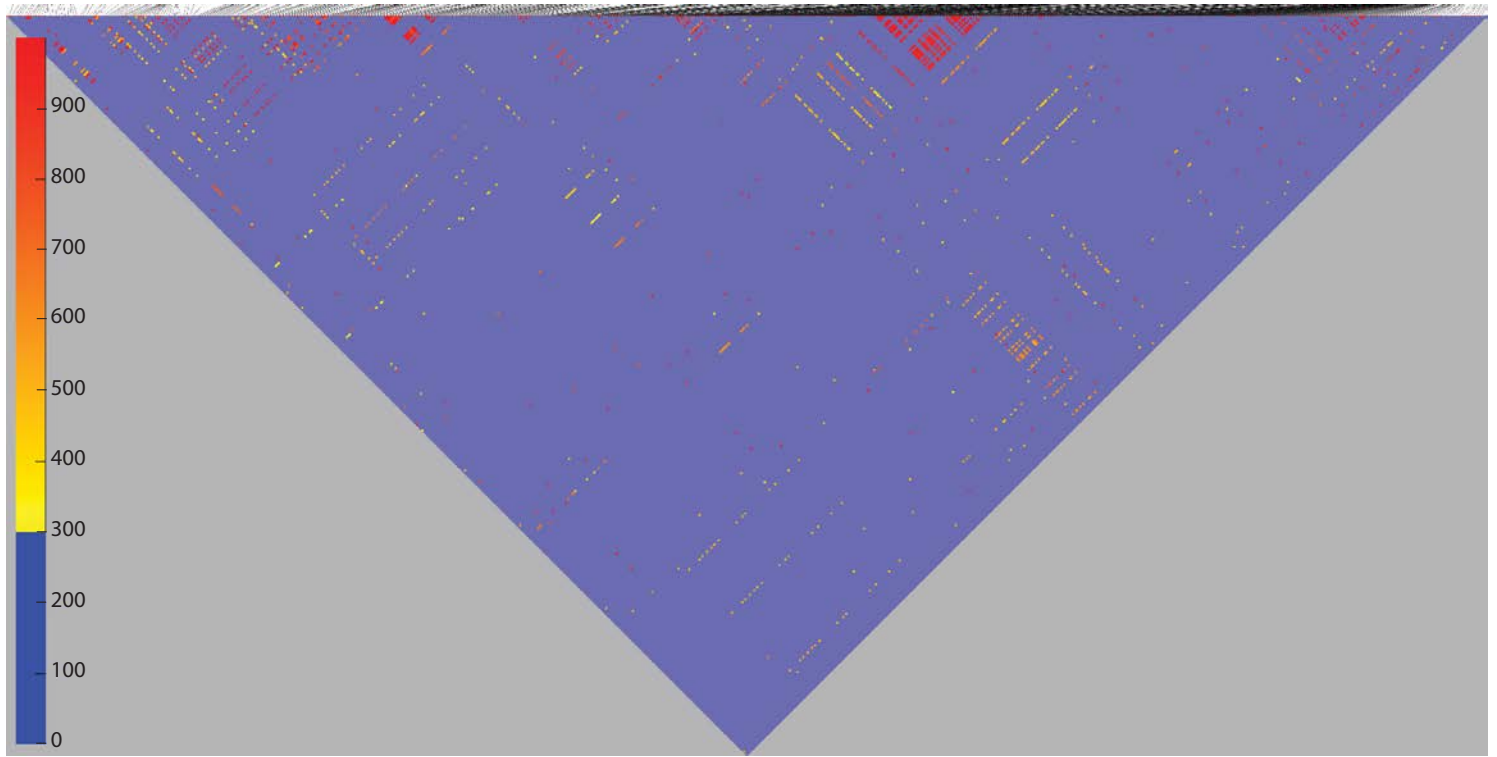

**Figure S2. Calculation of linkage disequilibrium by pairwise comparison of 500 SNPs.**

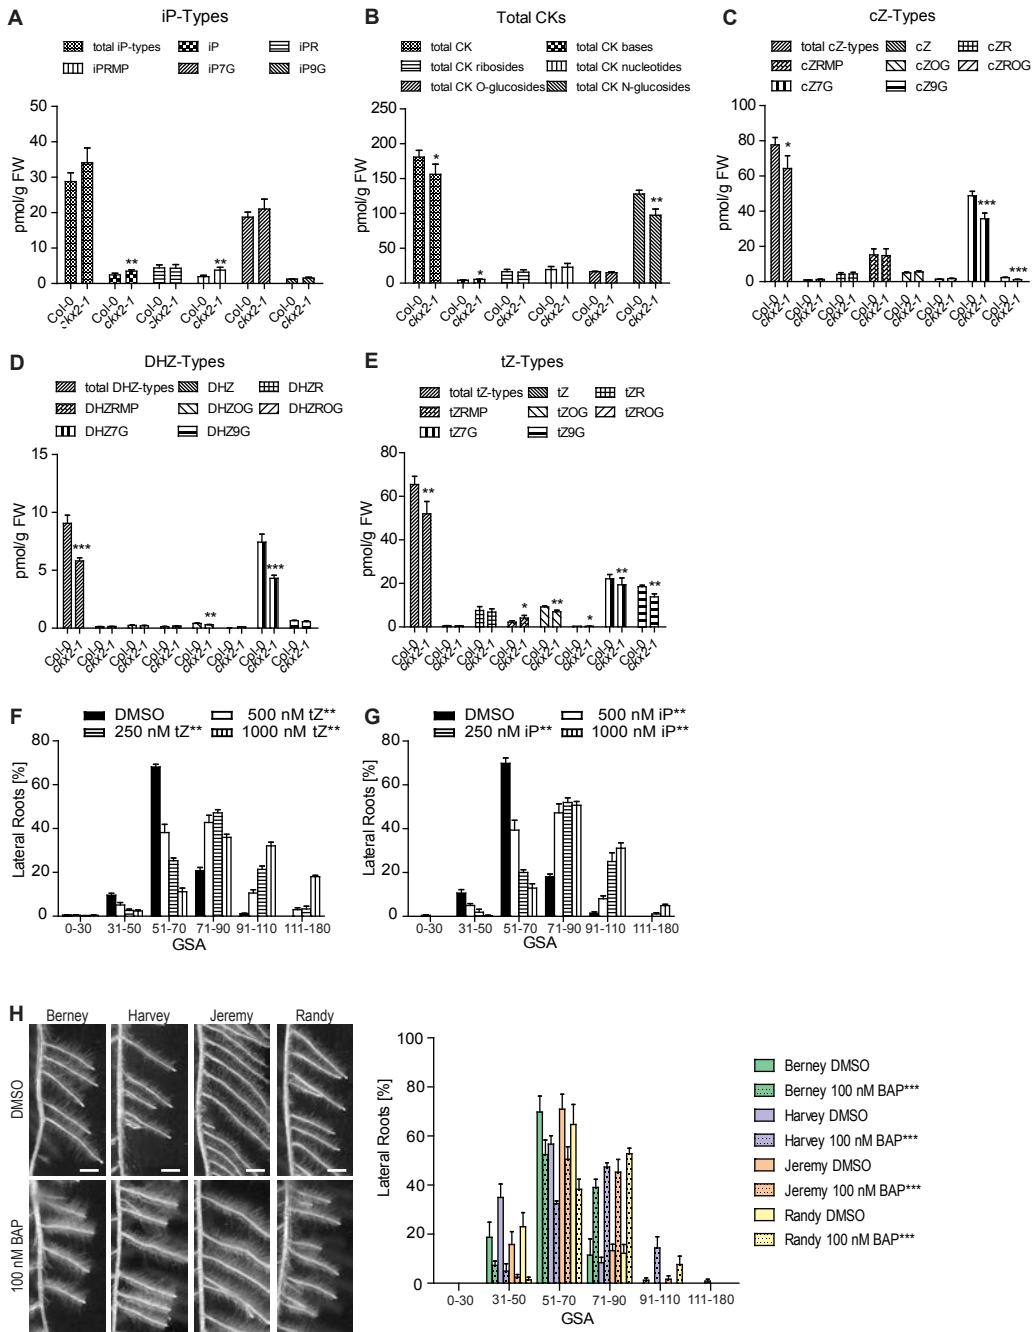

**Figure S3. Influence of cytokinin on GSA of lateral roots.**

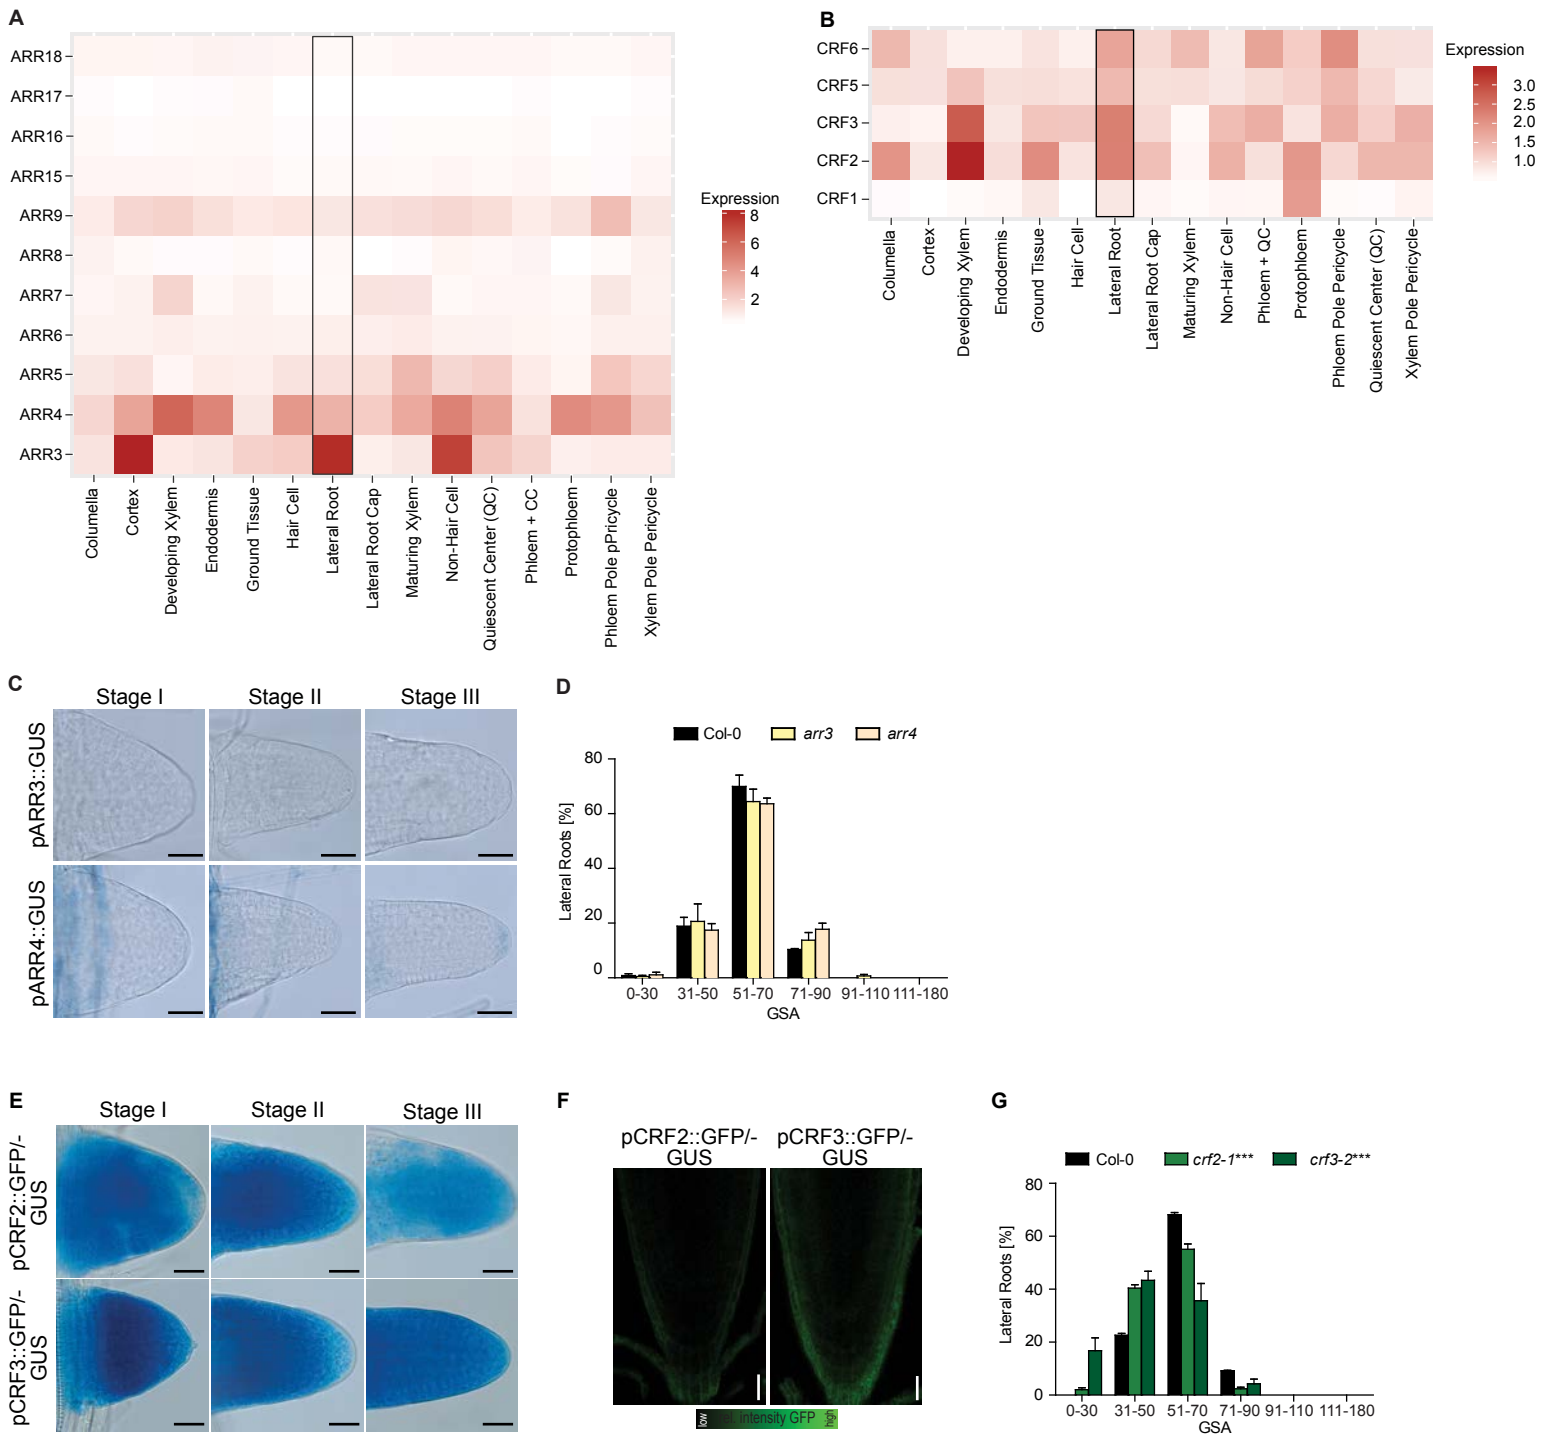

**Figure S4. Role of type-A Arabidopsis response regulators (ARRs) and cytokinin response factors (CRFs) in the GSA establishment in LRs.**



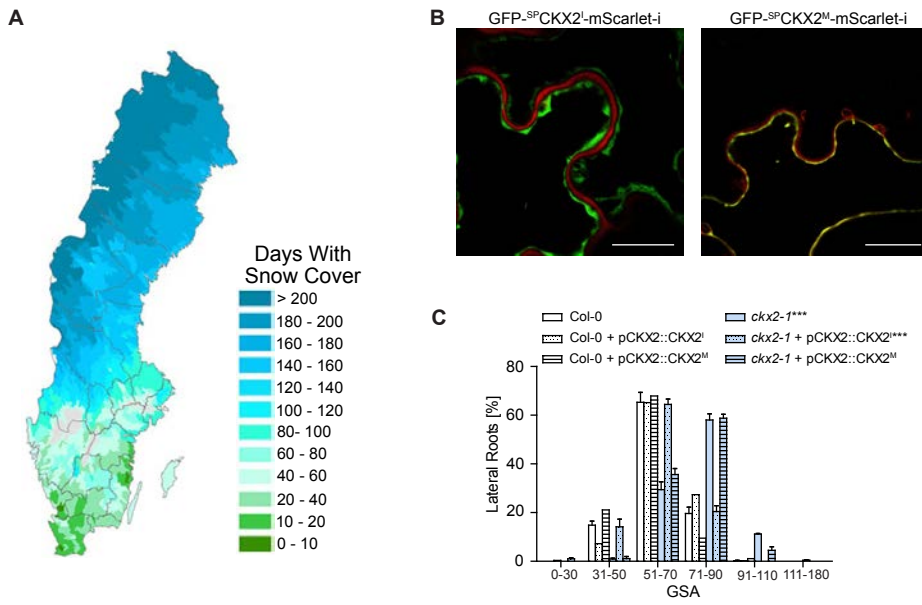

**Figure S5. Snow cover in Sweden and characterization of**

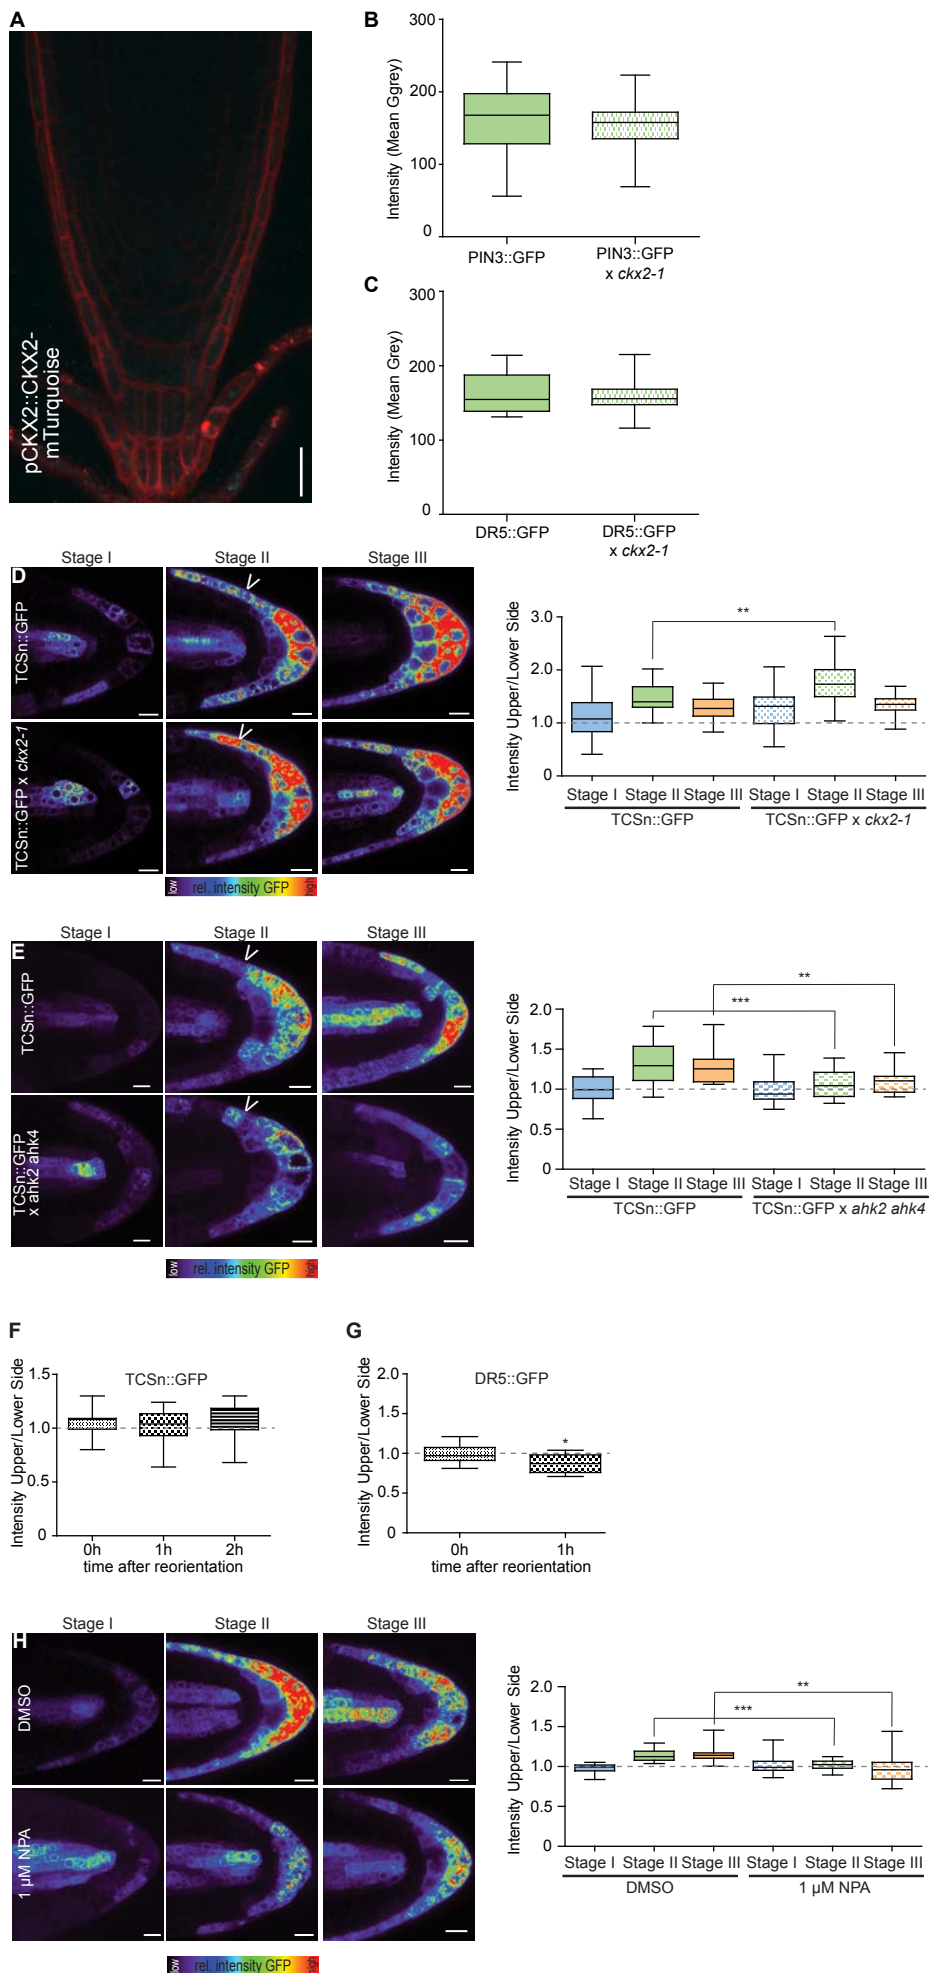

**Figure S6. Localization of CKX2 in the main root tip and characterization of cytokinin responses in *ckk2-1* mutants.**

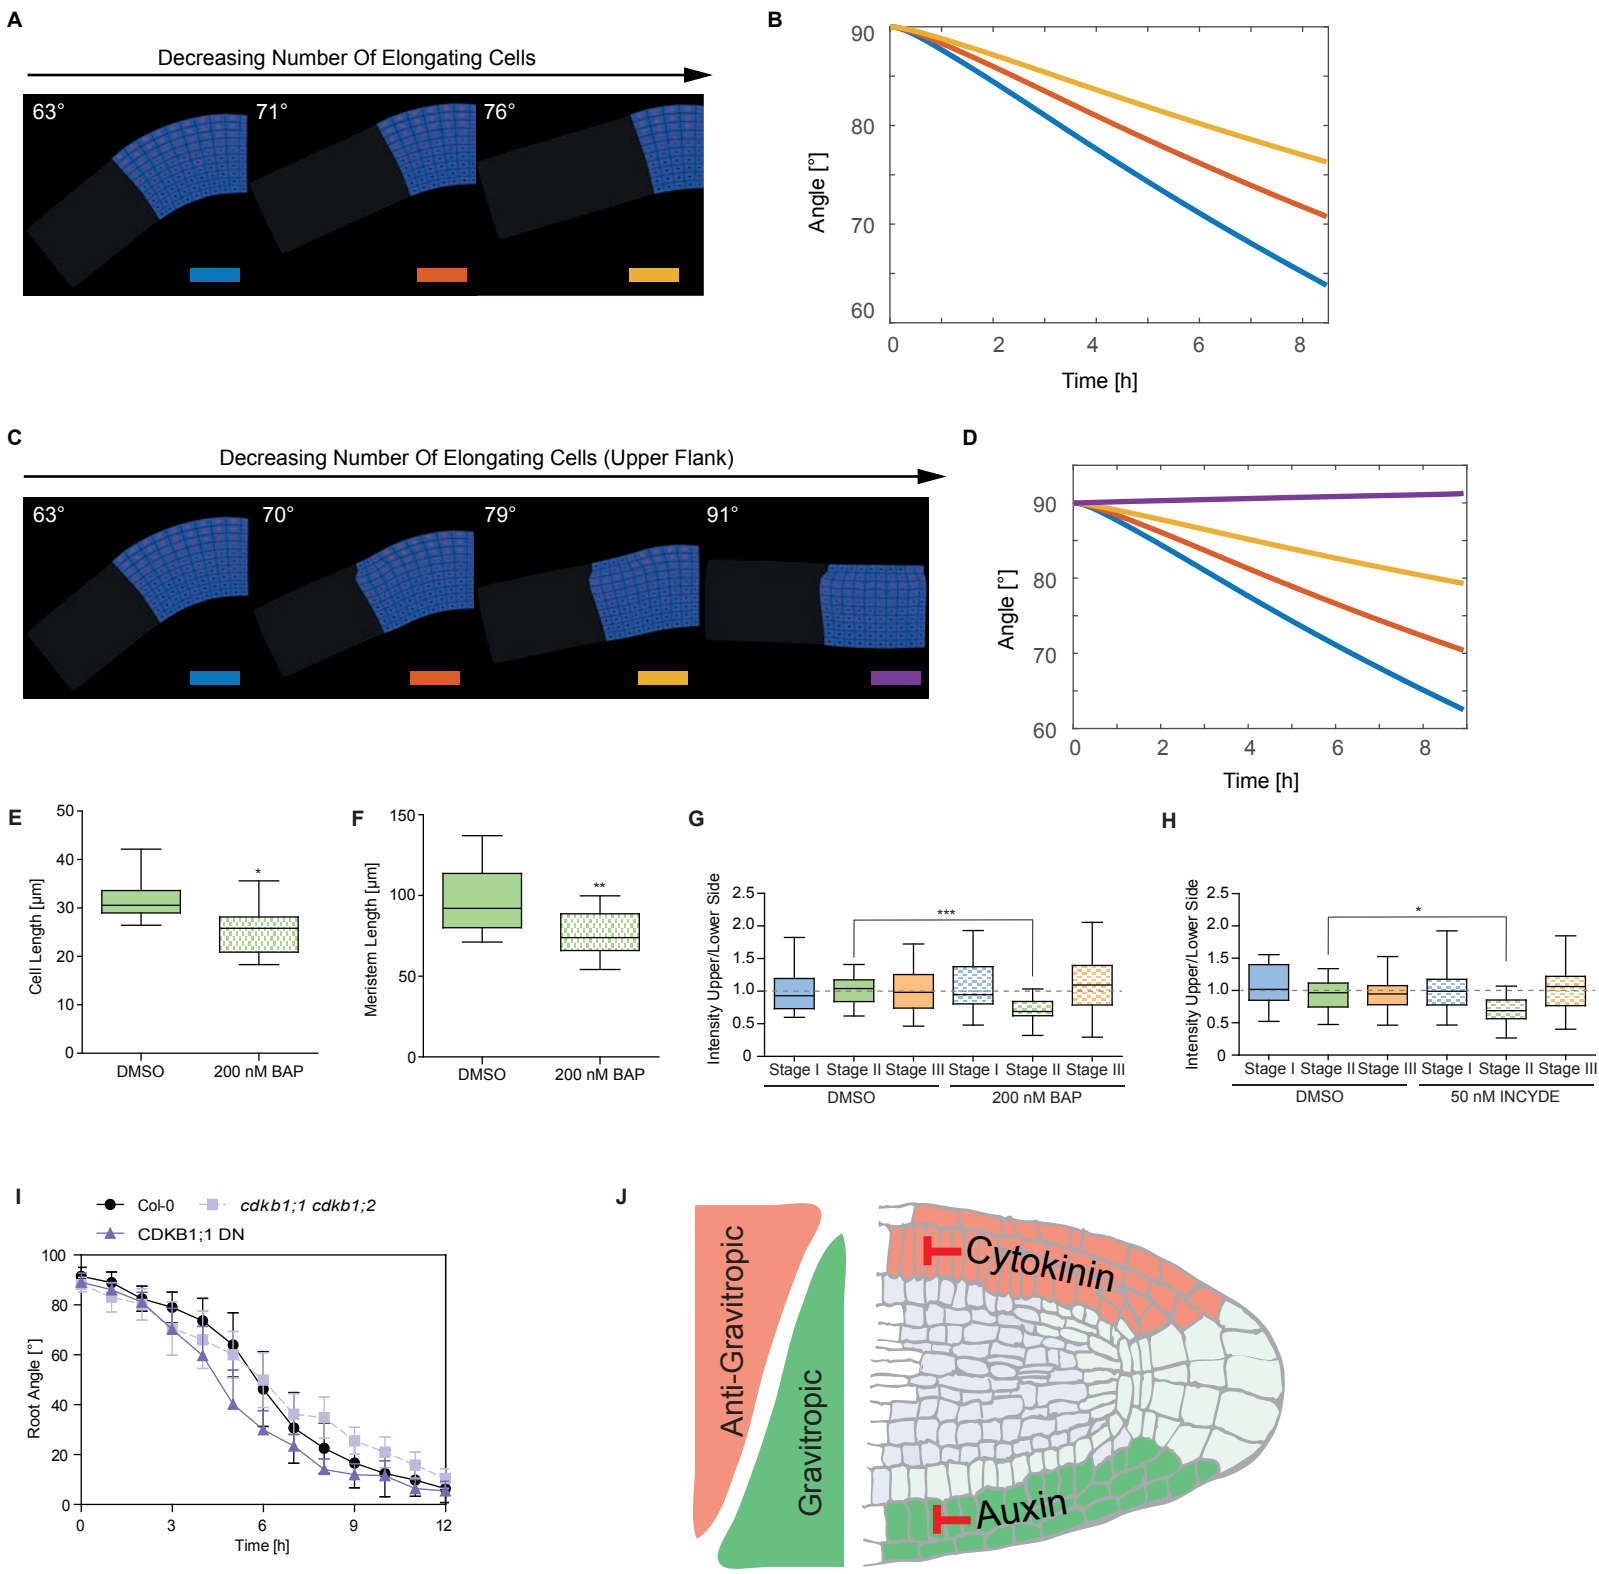

**Figure S7. Cytokinin-dependent interference with cell division rates defines angular growth of lateral roots.**

| Accession ID | Name           | Mean GSA Deviation<br>(compared to Col-0) |
|--------------|----------------|-------------------------------------------|
| 6180         | TÄL 07         | -18.58                                    |
| 7246         | Ma-2           | -18.10                                    |
| 9421         | Lan 1          | -17.06                                    |
| 9537         | IP-Cum-1       | -16.92                                    |
| 6931         | Kz-9           | -12.65                                    |
| 8311         | In-0           | -12.35                                    |
| 7299         | Pi-2           | -12.25                                    |
| 7201         | Kr-0           | -12.18                                    |
| 9759         | Anz-0          | -11.95                                    |
| 6073         | ÖMö1-7         | -11.87                                    |
| 7521         | Lp2-6          | -11.80                                    |
| 9530         | IP-Car-1       | -11.55                                    |
| 96           | LAC-5          | -11.08                                    |
| 6906         | C24            | -10.97                                    |
| 6951         | Pu2-23         | -10.80                                    |
| 6942         | Nd-1           | -10.61                                    |
| 6910         | Ct-1           | -10.20                                    |
| 8296         | Gd-1           | -9.98                                     |
| 204          | MIB-60         | -9.58                                     |
| 6915         | Ei-2           | -9.50                                     |
| 8348         | Nw-0           | -9.35                                     |
| 8249         | Vimmer<br>by   | -9.34                                     |
| 6922         | Gu-0           | -9.10                                     |
| 8353         | Pa-1           | -8.84                                     |
| 9336         | Bön 1          | -8.81                                     |
| 7276         | Ob-0           | -8.66                                     |
| 8240         | Kulturen-<br>1 | -8.61                                     |
| 6990         | Amel-1         | -8.28                                     |
| 6040         | Kni-1          | -8.21                                     |
| 6907         | CIBC-<br>17    | -7.87                                     |
| 7178         | Jm-1           | -7.76                                     |
| 7378         | Uk-1           | -7.74                                     |
| 7062         | Ca-0           | -7.67                                     |
| 7262         | Nw-4           | -7.45                                     |
| 6036         | Hov3-2         | -7.39                                     |
| 6897         | Ag-0           | -7.34                                     |
| 9165         | Truk-5         | -7.33                                     |
| 6413         | UII3-4         | -7.26                                     |
| 6899         | Bay-0          | -6.93                                     |
| 7000         | Aa-0           | -6.92                                     |

|      |          |       |
|------|----------|-------|
| 2320 | Wilcox-4 | -6.82 |
| 7291 | Pa-2     | -6.77 |
| 7143 | Gel-1    | -6.61 |
| 7199 | KI-5     | -6.19 |
| 7372 | Tscha-1  | -6.17 |
| 8312 | Is-0     | -6.09 |
| 9560 | IP-Mot-0 | -5.93 |
| 7520 | Lp2-2    | -5.80 |
| 6730 | CIBC-5   | -5.80 |
| 768  | Zal-1    | -5.79 |
| 7192 | Kil-0    | -5.75 |
| 224  | MIB-86   | -5.70 |
| 6085 | Sparta-1 | -5.34 |
| 8256 | Bå1-2    | -5.20 |
| 5723 | Chr-1    | -5.17 |
| 7310 | Pr-0     | -5.00 |
| 8214 | Gy-0     | -4.90 |
| 5751 | Kyl-1    | -4.88 |
| 8376 | Sanna-2  | -4.87 |
| 7255 | Mh-0     | -4.82 |
| 6994 | Ann-1    | -4.80 |
| 6074 | Ör-1     | -4.76 |
| 7205 | Krot-2   | -4.64 |
| 8337 | Mir-0    | -4.60 |
| 8258 | Bå4-1    | -4.58 |
| 8236 | HSm      | -4.53 |
| 6940 | Mz-0     | -4.50 |
| 6923 | HR-10    | -4.50 |
| 6981 | Ws-2     | -4.47 |
| 6035 | Hov1-10  | -4.47 |
| 6937 | Mrk-0    | -4.40 |
| 6984 | Zdr-1    | -4.28 |
| 9394 | Hag 2    | -4.24 |
| 7176 | Is-1     | -4.24 |
| 6038 | Hov3-5   | -3.99 |
| 7282 | Or-0     | -3.90 |
| 8270 | Bs-1     | -3.89 |
| 6076 | Rev-2    | -3.84 |
| 6924 | HR-5     | -3.78 |
| 7123 | Ep-0     | -3.70 |
| 8300 | Gr-1     | -3.70 |
| 6929 | Kondara  | -3.67 |
| 6933 | LL-0     | -3.60 |

|      |            |       |
|------|------------|-------|
| 8314 | Ka-0       | -3.59 |
| 6243 | Tottarp-2  | -3.14 |
| 7287 | Ove-0      | -3.12 |
| 6916 | Est-1      | -3.00 |
| 7522 | Mr-0       | -3.00 |
| 7166 | Hey-1      | -2.90 |
| 6930 | Kz-1       | -2.77 |
| 5729 | Coc-1      | -2.70 |
| 236  | MOG-11     | -2.60 |
| 7071 | Chat-1     | -2.57 |
| 394  | VOU-5      | -2.56 |
| 7092 | Com-1      | -2.46 |
| 6189 | TDr-2      | -2.45 |
| 9579 | IP-San-10  | -2.41 |
| 9143 | Navajo-5   | -2.24 |
| 6020 | Fjä1-5     | -2.17 |
| 7523 | Pna-17     | -2.11 |
| 6024 | Fly2-2     | -2.08 |
| 6030 | Grön-5     | -2.05 |
| 6023 | Fly2-1     | -1.93 |
| 7210 | La-1       | -1.73 |
| 5731 | Cr1-1      | -1.69 |
| 6077 | Rev-3      | -1.66 |
| 7351 | Ty-0       | -1.57 |
| 7147 | Gie-0      | -1.55 |
| 7384 | Ven-1      | -1.47 |
| 6956 | Pu2-7      | -1.31 |
| 6972 | Tsu-1      | -1.13 |
| 9308 | Ullapool-3 | -1.08 |
| 9817 | Ace-0      | -0.87 |
| 6945 | Nok-3      | -0.84 |
| 9848 | Glo-1      | -0.83 |
| 6975 | Uod-1      | -0.74 |
| 2057 | Map-42     | -0.70 |
| 8259 | Bå5-1      | -0.58 |
| 8395 | Tu-0       | -0.53 |
| 7002 | Baa-1      | -0.43 |
| 7519 | ÖMö2-3     | -0.40 |
| 6971 | Ts-5       | -0.16 |
| 6019 | Fjä1-2     | -0.11 |
| 7081 | Co         | -0.10 |
| 6928 | Kno-18     | -0.08 |

|      |                |       |
|------|----------------|-------|
| 9545 | IP-Her-12      | -0.06 |
| 8271 | Bu-0           | 0.06  |
| 6970 | Ts-1           | 0.10  |
| 7283 | Ors-1          | 0.15  |
| 6982 | Wt-5           | 0.19  |
| 6898 | An-1           | 0.20  |
| 9442 | Sim 1          | 0.49  |
| 6938 | Ms-0           | 0.50  |
| 6042 | Lom1-1         | 0.68  |
| 6936 | Lz-0           | 0.70  |
| 7275 | No-0           | 0.77  |
| 8329 | Lm-2           | 0.80  |
| 2171 | Paw-26         | 1.20  |
| 7172 | HI-3           | 1.20  |
| 6909 | Col-0          | 1.40  |
| 6944 | NFA-8          | 1.41  |
| 8310 | Hs-0           | 1.46  |
| 6973 | UII2-3         | 1.54  |
| 6976 | Uod-7          | 1.55  |
| 765  | Sus-1          | 1.58  |
| 8334 | Lu-1           | 1.70  |
| 7382 | Utrecht        | 1.77  |
| 8343 | Na-1           | 1.80  |
| 7015 | Bla-1          | 1.87  |
| 7477 | WAR            | 1.88  |
| 6987 | Ak-1           | 1.89  |
| 8354 | Per-1          | 1.99  |
| 6962 | Shahdar<br>a   | 2.03  |
| 7309 | Po-1           | 2.04  |
| 1874 | MNF-<br>Pot-80 | 2.30  |
| 9873 | Ndc-0          | 2.35  |
| 7268 | Np-0           | 2.37  |
| 6992 | Ang-0          | 2.43  |
| 6980 | Ws-0           | 2.61  |
| 6034 | Hov1-7         | 2.63  |
| 6979 | Wei-0          | 2.71  |
| 7004 | Bs-2           | 2.83  |
| 266  | RAN            | 3.61  |
| 7418 | Zu-1           | 3.73  |
| 6284 | TV-38          | 3.99  |
| 5719 | Bur-0          | 4.34  |
| 7438 | N13            | 4.71  |
| 7404 | Wc-1           | 5.34  |
| 1552 | Sku-30         | 5.53  |
| 766  | Dja-1          | 6.37  |

|      |                  |       |
|------|------------------|-------|
| 7307 | Pn-0             | 6.40  |
| 6153 | TAA 03           | 6.75  |
| 9427 | Näs 2            | 7.50  |
| 6025 | Gro-3            | 7.59  |
| 6900 | Bil-5            | 7.68  |
| 7353 | Tha-1            | 7.74  |
| 6978 | Wa-1             | 8.26  |
| 7242 | Lo-2             | 8.40  |
| 9089 | Nar-3            | 8.89  |
| 6043 | Löv-1            | 9.22  |
| 7352 | Te-0             | 9.42  |
| 6016 | Eds-1            | 9.56  |
| 7181 | Je-0             | 9.58  |
| 9388 | Grön 14          | 9.67  |
| 6977 | Van-0            | 9.83  |
| 6235 | TOM 01           | 9.85  |
| 6188 | TDr-1            | 10.34 |
| 6177 | TÅL 03           | 10.41 |
| 9831 | Cas-0            | 10.43 |
| 6169 | TÅD 01           | 10.45 |
| 9321 | Ådal 1           | 10.48 |
| 9433 | Nyl 13           | 10.54 |
| 9363 | EdJ 2            | 10.75 |
| 9354 | Eden 15          | 10.76 |
| 8230 | Algutsrum        | 10.88 |
| 6917 | Fäb-2            | 12.49 |
| 8326 | Lis-1            | 12.79 |
| 6184 | TBÖ 01           | 12.85 |
| 6199 | TDr-14           | 12.94 |
| 5856 | Dör-10           | 13.12 |
| 6237 | TOM 03           | 13.47 |
| 6946 | Oy-0             | 13.78 |
| 6070 | Omn-1            | 13.99 |
| 5835 | Bil-3            | 14.05 |
| 9332 | Bar 1            | 14.66 |
| 5829 | Ale1-2           | 15.46 |
| 6214 | TFÅ 04           | 15.78 |
| 998  | Ale-Stenar-57-16 | 18.22 |
| 6009 | Eden-1           | 19.08 |
| 6231 | TNY 04           | 20.01 |



| Fragment            | Sequence (5' to 3')                              |
|---------------------|--------------------------------------------------|
| CKX2 CDS pGEX FW    | GGATCTGCTGGTGCGGCTAATCTTCGTTTAAT                 |
| CKX2 CDS pGEX REV   | CCAGCGCTACCAGCGCCAAGATGTCTTGCCCTGGAG             |
| pCKX2 FW            | CGACGGTATCGATAAGCTTGATAACAGTAGTCGAACAGTTC        |
| pCKX2 REV           | TGCTCACCATTTGTTTATGTTTCTCTCTCTCTC                |
| CKX2 genomic FW     | AACATAAACAAATGGCTAATCTTCGTTTAATG                 |
| CKX2 genomic REV    | CCCATTCCAAGTAGAATTCGATGCAAAGATGTCTTGCCCTGG       |
| CKX2 CDS pPLV03 FW  | CGAGCTGTACAAGATGGCTAATCTTCGTTTAATG               |
| CKX2 CDS pPLV03 REV | CCTTGCTCACCATAAAGATGTCTTGCCCTGG                  |
| 35S FW              | GGTCGACGGTATCGATAAGCTTGATGACTAGAGCCAAGCTGATC     |
| 35S REV             | CCTTGCTCACCATTCGACTAGAATAGTAAATTGTAATGTTG        |
| GFP FW              | CTATTCTAGTCGAATGGTGAGCAAGGGCGAG                  |
| GFP REV             | GAAGATTAGCCATCTTGTACAGCTCGTCCATGC                |
| mScarlet-i FW       | GCAAGACATCTTTATGGTGAGCAAGGGCGAG                  |
| mScarlet-i REV      | TAACCCATTCCAAGTAGAATTCGATTTACTTGTACAGCTCGTCCATG  |
| CKX2 I23M FW        | ATCAAACGGTATGAAAATTGATT                          |
| CKX2 I23M REV       | AATCAATTTTCATACCGTTTGAT                          |
| CKX2_RT_FW          | ATGCACCTAAACGGGCCAAATG                           |
| CKX2_RT_REV         | CGACTCCAATATCGTTTGCCATTG                         |
| EIF4A_RT_FW         | CTGGAGGTTTTGAGGCTGGTAT                           |
| EIF4A_RT_REV        | CCAAGGGTGAAAGCAAGAAGA                            |
| UBQ5_RT_FW          | GTGAAGTGTAACGATGATGAC                            |
| UBQ5_RT_REV         | GATGTGATCCTTGTAGATGTTG                           |
| pCKX2::CKX2_FW      | GGTCGACGGTATCGATAAGCTTGATTCTTTTTGTCTAATAGGATTCTG |
| pCKX2::CKX2_REV     | GCCCTTGCTCACAAAGATGTCTTGCCCTGG                   |
| mTurquoise_FW       | GCAAGACATCTTTGTGAGCAAGGGCGAGGAG                  |
| mTurquoise_REV      | TAACCCATTCCAAGTAGAATTCGATCTTGTACAGCTCGTCCATGC    |
